1 Manuscript submitted to **Biophysical Journal**

2 **Article**

# 3 **Endocytosis against high turgor pressure is made** 4 **easier by partial protein coating and a freely rotating** 5 **base**

6 Rui Ma<sup>1,2,3\*</sup> and Julien Berro<sup>2,3,4\*</sup>

7 <sup>1</sup>Department of Physics, Xiamen University, Xiamen, 361005, China

8 <sup>2</sup>Department of Molecular Biophysics and Biochemistry, Yale University, New Haven, CT 06520, USA

9 <sup>3</sup>Nanobiology Institute, Yale University, West Haven, CT 06516, USA

10 <sup>4</sup>Department of Cell Biology, Yale University School of Medicine, New Haven, CT 06520, USA

11 \*Correspondence: ruima@xmu.edu.cn

12 \*Correspondence: julien.berro@yale.edu

13 **ABSTRACT** During clathrin-mediated endocytosis, a patch of flat plasma membrane is deformed into a vesicle. In walled  
14 cells, such as plants and fungi, the turgor pressure is high and pushes the membrane against the cell wall, thus hindering  
15 membrane internalization. In this paper, we study how a patch of membrane is deformed against turgor pressure by force and by  
16 curvature-generating proteins. We show that a large amount of force is needed to merely start deforming the membrane and an  
17 even larger force is needed to pull a membrane tube. The magnitude of these forces strongly depends on how the base of the  
18 membrane is constrained and how the membrane is coated with curvature-generating proteins. In particular, these forces can be  
19 reduced by partially but not fully coating the membrane patch with curvature-generating proteins. Our theoretical results show  
20 excellent agreement with experimental data.

**SIGNIFICANCE** Yeast cells have been widely used as a model system to study clathrin-mediated endocytosis. The mechanics of membrane during endocytosis has been extensively studied mostly in low turgor pressure condition, which is relevant for mammalian cells but not for yeast cells. It has been suggested that as a result of high turgor pressure in yeast cells, a large amount of force is needed to drive the progress of the membrane invagination. In this paper, we investigated biologically relevant mechanisms to reduce the force requirement. We highlight the role of boundary conditions at the membrane base, which is a factor that has been largely ignored in previous studies. We also investigate the role of curvature-generating proteins and show that a large protein coat does not necessarily reduce the force barrier for endocytosis.

## 21 **INTRODUCTION**

22 Clathrin-mediated endocytosis (CME) is an active process eukaryotic cells use to transport materials from their outside  
23 environment to inside of the cell (1–6). During CME, a patch of flat plasma membrane is bent into the cell and severed to  
24 release a vesicle (Figure 1a). Deforming the membrane towards the cytoplasm is opposed by membrane's resistance to bending  
25 and membrane tension (7, 8). In walled cells such as plants and fungi, the inward deformation is also opposed by turgor pressure,  
26 which pushes the membrane against the cell wall (9–11). In yeast cells, the inner pressure can be up to 1.5 MPa (12, 13). It is  
27 conjectured that as a consequence of this high turgor pressure, the membrane invagination exhibits a narrow tubular shape  
28 with a diameter of ~ 30 nm in yeast cells (4, 14), while in mammalian cells the invagination exhibits a spherical shape with a  
29 diameter of ~ 100 nm due to a relatively low pressure (~ 1kPa) (15).

30 In the past decade several theoretical models have been proposed to account for the membrane shape evolution during  
31 CME (16–20). Most of these models have assumed conditions relevant to mammalian cells, i.e. low turgor pressure (< 1 kPa)  
32 and focused on the role of membrane tension. Such tension-dominant membrane deformations have also been extensively studied  
33 in *in vitro* experiments where membrane tethers are pulled from giant liposomes (21–23). In contrast, the pressure-dominant  
34 regime of membrane deformations, which is relevant to endocytosis in walled cells, has been rarely studied (18). The role of  
35 turgor pressure in shaping the membrane has been extensively studied in the case of closed vesicles (24–26). The typical force

Rui Ma and Julien Berro

36 barrier to invaginate a membrane tube against a membrane tension of 0.01 pN/nm is only 10 – 100 pN, whereas a substantial  
37 force ( $\sim 1000$  pN) is required to overcome a turgor pressure of 1 MPa (5, 27, 28).

38 The cytoskeleton protein actin is essential for generating the forces required for CME in yeast cells (10, 29–35). However,  
39 the exact organization of actin filaments around the membrane invagination remains elusive. Actin filaments are likely organized  
40 into a tight meshwork since ribosomes are excluded from the endocytic sites and actin filaments are heavily crosslinked  
41 (Figure 1a and b) (36). How the actin machinery produces force to bend the membrane remains unclear. The most commonly  
42 accepted hypothesis is that polymerization of actin filaments is converted into a pulling force acting on the tip of the invagination  
43 through a push-pull mechanism (27, 37–39). In this mechanism, actin filaments are nucleated on a ring around a patch of  
44 clathrin and adaptor proteins. Polymerization of actin filaments at the ring, which is the base of the invagination, pushes the  
45 actin meshwork away from the plasma membrane, and in turn pulls the invagination inwards thanks to the adaptor proteins that  
46 link actin filaments to the membrane tip.

47 Membrane can also be bent by proteins that induce membrane curvature. Clathrin molecules can assemble into a cage-like  
48 icosahedral lattice composed of hexagons and pentagons *in vitro* (40, 41). The clathrin-lattice alone is able to induce spherical  
49 buds from membrane in reconstituted experiments (42). In yeast cells, the clathrin lattice acts as a scaffold linked to the  
50 plasma membrane via adaptor proteins and they together form a rigid coat at the membrane invagination tip (43, 44). Based on  
51 measurements of the copy number of clathrin molecules in yeast cells, this coat is expected to form a hemi-spherical cap (45).  
52 Many clathrin-associated proteins, such as BAR-domain proteins and epsin, have also shown the capacity to induce membrane  
53 curvature and might help with CME (46, 47).

54 In this paper, we study CME under conditions of high turgor pressure and low membrane tension by investigating a  
55 theoretical model, which describes how a membrane patch is deformed by a point force and by proteins that induce membrane  
56 curvature. In the absence of coat proteins, we show that as a result of high turgor pressure (1 MPa), a large amount of force is  
57 needed to merely start deforming the membrane and an even larger force is needed to pull a membrane tube. We also show that  
58 the magnitude of these forces strongly depend on the constraints at the base of the membrane patch. In particular, the force to  
59 start deforming the membrane increases with the base radius, while the force barrier to pull a membrane tube decreases with the  
60 base radius. The forces also depend on whether the angle of the membrane at the base can freely rotate or not.

61 When the membrane is coated with curvature-generating proteins, we show that the forces to deform partially coated  
62 membranes are quantitatively and qualitatively different from the forces to deform fully coated membranes. By partially coating  
63 the membrane, the force barrier that is usually present for fully coated membranes can be dramatically reduced to zero, which  
64 implies that the membrane can be spontaneously curved up into a vesicular shape.

65 We find excellent agreement between our theory and experiments. With a single set of parameters for the partially coated  
66 membrane model, we can fit geometric features of the membrane shape obtained via electron tomography across different  
67 stages of CME. From the comparison, we estimate that the force required for CME in yeast cells is  $\sim 2500$  pN if the membrane  
68 angle at the base is free to rotate. This result suggests that actin polymerization alone is insufficient to provide the force to drive  
69 the membrane invagination during CME.

## 70 METHODS

### 71 Model of the membrane patch at the endocytic site

72 We model the membrane patch at the endocytic site as an axisymmetric two-dimensional surface. The shape of the membrane is  
73 parameterized with its meridional coordinates  $[R(s), Z(s)]$ , where  $s$  is the arclength along the meridional direction (Figure 1c).  
74 The angle  $\psi(s)$  spans between the tangential direction and the horizontal direction. The actin polymerization force is modeled as  
75 a point force  $f$  acting at the symmetric center of the membrane, which is lifted to a height  $L$  relative to the cell wall (Figure 1c).  
76 The membrane patch is in contact with the cell wall at a base radius of  $R_b$ , which is covered by a ring of proteins as observed in  
77 recent experiments (27). We assume the proteins serve as anchors that fix the base of the membrane to the cell wall, therefore  
78  $R_b$  is a constant. Outside of  $R_b$  there is a lipid reservoir such that the membrane tension  $\sigma$  is kept constant at the base points.  
79 An isotropic turgor pressure  $p$  is exerted on the membrane, which possesses a bending rigidity  $\kappa$  and spontaneous curvature  $c_0$   
80 due to protein coating. The free energy of the membrane, which takes into account of the influence of curvature-generating  
81 proteins, can be written as

$$G = \frac{\kappa}{2} \int (c_1 + c_2 - c_0)^2 dA + \sigma A + pV - fL, \quad (1)$$

82 where  $c_1$  and  $c_2$  denote the two principle curvatures of the membrane surface (48),  $A$  denotes the surface area and  $V$  denotes  
83 the volume between the membrane and the cell wall. The reference state for the free energy  $G$  in Eq. (1) is a vertically flat and  
84 horizontally circular shape. We consider both a homogeneous model where the spontaneous curvature  $c_0$  is spatially uniform -  
85 such as a bare membrane or a membrane fully coated with curvature-generating proteins - and an inhomogeneous model where

<sup>86</sup>  $c_0$  is spatially varied - such as a membrane partially coated by curvature-generating proteins (Figure 1c).

<sup>87</sup> Due to rotational symmetry about the  $z$ -axis, the free energy of the membrane in Eq. (1) can be expressed as a functional

$$G = 2\pi \int_0^S \mathcal{G}[\psi, R, \dot{\psi}, \dot{R}, \gamma] ds, \quad (2)$$

<sup>88</sup> where  $\dot{\psi}$  and  $\dot{R}$  denote their derivatives with respect to the arclength  $s$ ,  $S$  denotes the total arclength from the tip to the base,  $\gamma$  is  
<sup>89</sup> a Lagrangian multiplier that enforces the geometric relation  $\dot{R} = \cos \psi$  (see Appendix for the explicit form of  $\mathcal{G}$ ). The shape of  
<sup>90</sup> the membrane is determined by minimization of the free energy  $G$  with respect to small variations of the membrane shape  
<sup>91</sup> variables  $\delta\psi$  and  $\delta R$ . Proper boundary conditions (BCs) at the base, where the ring of proteins are formed and the membrane  
<sup>92</sup> is in contact with the cell wall, are also needed to determine the membrane shape. The exact BCs require knowledge of the  
<sup>93</sup> microscopic interactions between the membrane, the cell wall, and the ring of proteins. As these microscopic interactions are  
<sup>94</sup> unclear, we choose to derive the BCs in the following way. The small variations of  $\delta\psi$  and  $\delta R$  result in variation of the free  
<sup>95</sup> energy  $\delta G$ , which consists of boundary terms like  $\frac{\partial \mathcal{G}}{\partial \dot{\psi}} \delta\psi$  and  $\frac{\partial \mathcal{G}}{\partial \dot{R}} \delta R$ . Four types of BCs at the base can be identified by letting  
<sup>96</sup> these boundary terms vanish (Table 1). Physically they correspond to the combination of whether the base radius is fixed or  
<sup>97</sup> variable, and whether the angle of the membrane at the base is fixed or free to rotate. We focus on the two BCs where the base  
<sup>98</sup> radius is fixed ( $R = R_b$ ) and refer them as free-hinge BC (BC1 in Table 1) if the membrane angle is free to rotate ( $\frac{\partial \mathcal{G}}{\partial \dot{\psi}} = 0$ ) and  
<sup>99</sup> fixed-hinge BC (BC2 in Table 1) if the membrane angle is fixed to zero ( $\psi = 0$ ). We also compare our results with a previous  
<sup>100</sup> work (18), which studied the homogeneous model with a BC where the base is free to move and the membrane angle is fixed  
<sup>101</sup> (BC4 in Table 1).

Table 1: Possible boundary conditions at the base of the endocytic membrane.

|                  | Base radius | Membrane angle at the base | Mathematical definition                                                                                   |
|------------------|-------------|----------------------------|-----------------------------------------------------------------------------------------------------------|
| BC1 <sup>a</sup> | fixed       | free                       | $R = R_b, \frac{\partial \mathcal{G}}{\partial \dot{\psi}} = 0$                                           |
| BC2 <sup>b</sup> | fixed       | fixed                      | $R = R_b, \psi = 0$                                                                                       |
| BC3              | free        | free                       | $\frac{\partial \mathcal{G}}{\partial \dot{R}} = 0, \frac{\partial \mathcal{G}}{\partial \dot{\psi}} = 0$ |
| BC4 <sup>c</sup> | free        | fixed                      | $\frac{\partial \mathcal{G}}{\partial \dot{R}} = 0, \psi = 0$                                             |

<sup>a</sup> Referred to as the free-hinge BC.

<sup>b</sup> Referred to as the fixed-hinge BC.

<sup>c</sup> BC4 has been studied in (18) for the homogeneous model.

Table 2: Fitting parameters to compare with experimental data

| Symbols  | Physical meaning                                              | Values for the free-hinge BC | Values for the fixed-hinge BC |
|----------|---------------------------------------------------------------|------------------------------|-------------------------------|
| $p$      | Turgor pressure                                               | 1 MPa                        | 1 MPa                         |
| $R_p$    | Characteristic tube radius                                    | 16 nm                        | 21 nm                         |
| $c_0$    | Spontaneous curvature of the membrane induced by protein coat | $0.063 \text{ nm}^{-1}$      | $0.048 \text{ nm}^{-1}$       |
| $a_0$    | Coating area of proteins                                      | $1609 \text{ nm}^2$          | $2771 \text{ nm}^2$           |
| $R_b$    | Base radius of the membrane patch                             | 32 nm                        | 42 nm                         |
| $\sigma$ | Surface tension at the base                                   | $0.032 \text{ pN/nm}$        | $0.042 \text{ pN/nm}$         |
| $\alpha$ | Control parameter for the sharpness of the coating edge       | $0.006 \text{ nm}^{-2}$      | $0.004 \text{ nm}^{-2}$       |

Rui Ma and Julien Berro

## RESULTS

### The characteristic forces to elongate a membrane tube are different between pressure-dominant and tension-dominant conditions.

To demonstrate the distinct physics of CME between pressure-dominant and tension-dominant conditions, we approximate the elongated endocytic invagination (as in Figure 1a, for example) as a cylindrical tube of radius  $R$  and length  $L$  and derive analytic formulas for the forces to elongate a membrane tube. The free energy (1) under this approximation becomes

$$G_{\text{tube}} = 2\pi RL \left[ \frac{\kappa}{2} \left( \frac{1}{R} - c_0 \right)^2 + \sigma + \frac{pR}{2} \right] - fL. \quad (3)$$

Without considering the effect of the spontaneous curvature ( $c_0 = 0$ ), in the case of pressure-dominant condition ( $\sigma = 0$ ), by minimization of  $F_{\text{tube}}$  with respect to  $R$  and  $L$ , we obtain the characteristic tube radius  $R_p$  and the corresponding force  $f_p$  (18):

$$R_p = \left( \frac{\kappa}{2p} \right)^{1/3}, \quad f_p = 3\pi R_p^2 p = \frac{3\pi}{2} (2\kappa^2 p)^{1/3}. \quad (4)$$

Note that the tube radius scales with the turgor pressure as  $R_p \propto p^{-1/3}$ , but the force obeys  $f_p \propto p^{1/3}$ . This means a higher turgor pressure results in a narrower tube, but needs larger forces to elongate. In the case of tension-dominant condition, the characteristic tube radius  $R_\sigma$  and force  $f_\sigma$  read (49):

$$R_\sigma = \left( \frac{\kappa}{2\sigma} \right)^{1/2}, \quad f_\sigma = 4\pi R_\sigma \sigma = 2\pi (2\kappa\sigma)^{1/2}. \quad (5)$$

As for endocytosis in yeast cells,  $\sigma \approx 0.01$  pN/nm (19),  $p \approx 1$  MPa (12, 13) and  $\kappa \approx 300k_B T$  (43). These numbers lead to a rough estimation of  $R_p \approx 8.5$  nm,  $f_p \approx 700$  pN and  $R_\sigma \approx 250$  nm,  $f_\sigma \approx 30$  pN. The radius of long endocytic invaginations observed experimentally is about 15 nm (14), which is much closer to the estimated  $R_p$  than the estimated  $R_\sigma$ , thus supporting the statement that the turgor pressure but not the membrane tension is the dominant factor that opposes endocytosis in yeast cells. For the rest of the paper, we assume  $\sigma = 0.002pR_p$  such that  $R_\sigma = 22R_p \gg R_p$ , and therefore the turgor pressure always dominates over the surface tension in shaping the membrane. We measure the length in units of the characteristic radius  $R_p$  and the force in units of the characteristic force  $f_p$ . The pressure is non-dimensionalized with  $\kappa/R_p^3$  to a constant 0.5. The mechanics of the system is then determined by only a few dimensionless parameters, including the rescaled base radius  $R_b/R_p$ , the rescaled spontaneous curvature  $c_0R_p$ , as well as the rescaled coating area  $a_0/(2\pi R_p^2)$  and the rescaled edge sharpness parameter  $\alpha 2\pi R_p^2$  when considering the inhomogeneous model (see Eq. (6)).

### A large base radius lowers the force barrier to pull a membrane tube against turgor pressure.

We first consider the case of a membrane at the endocytic site void of any curvature-generating proteins (i.e.,  $c_0R_p = 0$ ), and study the effect of base radius on the required forces to pull a membrane tube. The effect of forces on the membrane deformation is characterized by the force-height ( $f$ - $L$ ) curve, which in general is non-monotonic (Figure 2a - d). A force barrier  $F_{\text{max}}$  appears at a relatively low height  $L$  when the membrane is dome-shaped (Figure 2a - d, inset, labeled by circles). As the membrane is lifted further up, the membrane changes from a dome-shape to an  $\Omega$ -shape, when a narrow neck appears (signaled by the tangential angle  $\psi = \pi/2$  at an intermediate arclength). The force  $f$  then decreases with  $L$  and approaches the elongation force  $F_e \equiv \lim_{L \rightarrow \infty} f(L)$ , which equals  $f_p$  in the case of a bare membrane as expected by Eq. (4). The existence of a force barrier in the  $f$ - $L$  curve is similar to that in the tension-dominant condition (49). However, two striking differences should be noted: (i) in the pressure-dominant condition discussed here, a nonzero initiation force  $F_{\text{init}} \equiv f(L=0)$  is needed to merely start deforming the membrane, i.e., to lift the membrane just off the cell wall (Figure 2e and f, diamonds), whereas in the tension-dominant condition,  $F_{\text{init}} = 0$  is independent of  $R_b$  (49); (ii) when pressure dominates, the force barrier  $F_{\text{max}}$  significantly varies with the base radius  $R_b$  (Figure 2e and f, circles), whereas in the tension-dominant condition,  $F_{\text{max}}$  always overshoots 13% relative to the equilibrium force  $f_\sigma$  (49), independent of  $R_b$ .

When comparing the differences between the  $f$ - $L$  curves for the two BCs, we notice that: (i) the initiation force  $F_{\text{init}}$  scales with the base radius  $R_b$  as  $F_{\text{init}} = \frac{3}{8}\pi R_b^2 p$  for the free-hinge BC, whereas  $F_{\text{init}} = \frac{1}{4}\pi R_b^2 p$  for the fixed-hinge BC (Figure 2e and f, solid curves, see Supporting Material for the derivation); (ii) though the initiation force  $F_{\text{init}}$  is smaller for the fixed-hinge BC than for the free-hinge BC, the opposite trend is observed for the force barrier  $F_{\text{max}}$ . The difference in  $F_{\text{max}}$  is more pronounced for smaller base radii. For instance, when  $R_b = 0.5R_p$ , the force barrier  $F_{\text{max}}$  is about  $4f_p$  for the free-hinge BC, while it is  $7f_p$  for the fixed-hinge BC (Figure 2a and b, labeled by circles); (iii) The membrane neck appears at a smaller membrane height

143 for the fixed-hinge BC than for the free-hinge BC. For instance, when  $R_b = 2R_p$ , the neck appears at a height of  $3R_p$  for the  
144 fixed-hinge BC, but  $4R_p$  for the free-hinge BC (Figure 2c and d, labeled by squares).

145 When the membrane is pulled up above the height of  $6R_p$ , the force to elongate the tube remains almost unchanged  $F_e = f_p$ ,  
146 regardless of the BCs and the base radii. However, the shape of the membrane can be quite different for different radii  $R_b$ . If  
147  $R_b < R_p$ , the membrane exhibits a balloon-shape with a narrower base than the tubular body (Figure 2a and b, inset, labeled by  
148 triangles), whereas when  $R_b > R_p$ , a wider base connected to a narrower body is observed (Figure 2c and d, inset, labeled by  
149 triangles), which is more consistent with experimental observations (14).

150 For both BCs, the force barrier  $F_{\max}$  is significantly reduced with increasing base radius  $R_b$ . When the base radius is  
151 increased from  $0.5R_p$  to  $3R_p$ , the force barrier is reduced from  $4f_p$  to  $1.5f_p$  for the free-hinge BC, and from  $7f_p$  to  $2f_p$  for the  
152 fixed-hinge BC (Figure 2e, f, circles). These results suggest that a relatively wide base facilitates CME in yeast cells. With  
153 parameters listed in Table 2, the force barrier to pull a membrane tube against a turgor pressure of 1 MPa can be reduced to  
154 3500 pN for the free-hinge BC and 8000 pN for the fixed-hinge BC when the base radius  $R_b$  is greater than 30 nm (Figure 2e, f,  
155 circles). For the rest of the paper, we fix the base radius at  $R_b = 2R_p$  and study the other factors that influence the membrane  
156 shape and the force to pull a membrane tube.

### 157 **The ability of a fully-covered protein coat to reduce the force barrier and the initiation force** 158 **depends on boundary conditions**

159 In this section, we consider the effect of a uniform coat of curvature-generating proteins on membrane deformations. The ability  
160 of curvature-generating proteins to induce membrane curvature is characterized by the spontaneous curvature  $c_0$  in the model.  
161 When the spontaneous curvature  $c_0$  is small, e.g.,  $c_0R_p = 0.2$ , the  $f$ - $L$  curves show similar trends as a fully uncoated coated  
162 membrane. However, a new branch of solutions with negative forces emerges (Figure 3a and b, dashed line). On this branch, the  
163 membrane exhibits a highly curved  $\Omega$ -shape, and has part of the shape lying below the plane  $z = 0$ . The membrane therefore  
164 may interact with the cell wall. This interaction is not considered in our model. The branch terminates at a limiting shape of a  
165 closed spherical vesicle budding off from the base (Figure 3a and b, inset, labeled by stars). The free energy of the membrane on  
166 this negative-force branch is significantly higher than that on the positive-force branch (Figure S1 in the Supporting Material),  
167 thus being energetically unfavorable. Hereafter, the free energy refers to Eq. (1) excluding the contribution  $-fL$  from the  
168 external pulling force.

169 When the spontaneous curvature  $c_0$  is large, e.g.,  $c_0R_p = 1$ , the  $f$ - $L$  curve breaks into two branches, each branch only  
170 covering part of the membrane height (Figure 3c and d). In the small- $L$  branch, one  $L$  has two corresponding forces  $f$ . The  
171 larger  $f$  corresponds to a solution with a dome shape (Figure 3c and d, inset, labeled by circles), while the smaller  $f$  corresponds  
172 to a solution with an  $\Omega$ -shape (Figure 3c and d, inset, labeled by hexagons). The dome-shape has lower free energy than the  
173  $\Omega$ -shape for the same membrane height  $L$ , and therefore is energetically more stable (Figure S1, c and d). The large- $L$  branch  
174 starts from a point at which the force  $f$  is slightly above zero, and the shape of the membrane is shown as a vesicle budding off  
175 from the base (Figure 3c and d, inset, labeled by stars). This shape has the lowest free energy in the large- $L$  branch, which  
176 implies that if a long tube is pulled up and maintained by a force, when the force is gradually released, the tube retracts and a  
177 vesicle spontaneously forms and detaches from the base of the membrane.

178 For a fully coated membrane, increasing the spontaneous curvature  $c_0$  is able to reduce the elongation force  $F_e$ . With  
179 increasing  $c_0R_p$  from 0 to 1,  $F_e$  shows exactly the same dependence on  $c_0$  for both BCs and drops from  $f_p$  to about  $0.2f_p$   
180 (Figure 3e and f, squares). However, the impact of the spontaneous curvature  $c_0$  on the initiation force  $F_e$  and the force barrier  
181  $F_{\max}$  shows qualitative differences between the two BCs: (i) under the free-hinge BC, the initiation force  $F_{\text{init}}$  drops down with  
182 increasing  $c_0$  and becomes negative for  $c_0R_p > 0.4$  (Figure 3e, diamonds and solid line). This negative  $F_{\text{init}}$  implies that the  
183 membrane is spontaneously bent off the cell wall without external forces. By contrast, under the fixed-hinge BC, the initiation  
184 force  $F_{\text{init}}$  remains positive and almost constant (Figure 3f, diamonds and solid line); (ii) the force barrier  $F_{\max}$  noticeably  
185 decreases from  $1.5f_p$  to  $f_p$  with increasing  $c_0$  under the free-hinge BC, while  $F_{\max}$  remains almost constant at  $2f_p$  under the  
186 fixed-hinge BC (Figure 3e and f, circles).

187 In biological terms, our results suggest that for a membrane fully coated with curvature-generating proteins, the protein  
188 coat might significantly reduce the forces to start deforming the membrane if the membrane angle at the base is free to  
189 rotate. However, the protein coat has little impact on the forces if the membrane angle is fixed to zero. With the parameters  
190 listed in Table 2, the force barrier to pull a membrane tube for the fixed-hinge BC can be reduced from 3500 pN for a fully  
191 uncoated membrane to 2500 pN for a fully-coated membrane (Figure 3e, circles), but the force barrier is kept at 8000pN for the  
192 fixed-hinge BC, regardless of the spontaneous curvature (Figure 3f, circles).



## 193 Partially coating the membrane with curvature-generating proteins can reduce the initiation force 194 and the force barrier but not the elongation force

195 In this section, we study the inhomogeneous model where the membrane is coated with curvature-generating proteins only  
196 around the tip, thus mimicking the distribution of clathrin and other adaptor proteins. The spontaneous curvature in our model  
197 spatially varies as

$$c_0(a) = \frac{c_0}{2} \{1 - \tanh[\alpha(a - a_0)]\}, \quad (6)$$

198 where  $a(s)$  is the surface area calculated from the tip to the position of arclength  $s$ . The parameter  $\alpha$  controls the sharpness of  
199 the coating edge. The coating area of proteins is denoted by  $a_0$ , and these proteins induce a spontaneous curvature of  $c_0$  in the  
200 coated region of the membrane. This form of spontaneous curvature has been used in many previous studies (16, 17, 19, 20).

201 We first vary the coating area  $a_0$  while fixing the spontaneous curvature at  $c_0 R_p = 1$ . When  $a_0$  is small, the  $f$ - $L$  curves are  
202 non-monotonic with a single force barrier  $F_{\max}^1$  at a low membrane height, similar to that of a bare membrane (data not shown).  
203 However, when  $a_0$  is above a critical value, a second force barrier  $F_{\max}^2$  emerges on the  $f$ - $L$  curve at a higher membrane height  
204 where the membrane exhibits an  $\Omega$ -shape (Figure 4a and b, inset, labeled by triangles). For  $a_0/(2\pi R_p^2) = 1$ , the protein coat  
205 forms a hemispherical cap when the membrane is pulled up into a tubular shape (Figure 4a and b, inset, labeled by triangles).  
206 The initiation forces are negative for both BCs and the zero force  $f = 0$  intersects with the  $f$ - $L$  curve at a positive membrane  
207 height (Figure 4a and b, inset, labeled by circles). For very large coating area ( $a_0/(2\pi R_p^2) = 2$ ), the membrane is almost fully  
208 coated with proteins when the membrane is flat (Figure 4c, inset, labeled by circles). The  $f$ - $L$  curve is broken into two branches,  
209 each branch only covering part of the membrane height (Figure 4c and d), similar to the  $f$ - $L$  curve of a fully coated membrane.  
210 The two branches might overlap in some intermediate membrane heights. For the free-hinge BC, the zero force  $f = 0$  intersects  
211 with the  $f$ - $L$  curve at three points, two of them lying on the small- $L$  branch and the third one on the large- $L$  branch (Figure 4c,  
212 inset, labeled by circles and squares in the small- $L$  branch and triangles in the large- $L$  branch). The two points on the small- $L$   
213 branch correspond to a dome-shape of low free energy and a tubular shape of high free energy (Figure S2, c, circles and  
214 squares). Therefore, in the absence of forces, the membrane adopts a dome-shape, spontaneously curved off from the cell wall.  
215 The one point on the large- $L$  branch corresponds to a highly curved  $\Omega$ -shape with a narrow neck (Figure 4c, inset, labeled by  
216 triangles), which is the final shape of a long membrane tube when it retracts upon force release. The large- $L$  branch starts with a  
217 limiting membrane shape that is a closed vesicle budding off from the base (Figure 4c, inset, labeled by stars). In contrast with  
218 the fully coated membrane, the force at this point is negative, which means that a downward force is further needed to push the  
219 membrane into a budding vesicle when the membrane tube retracts. Under the fixed-hinge BC, the  $f$ - $L$  curve for  $a_0/(2\pi R_p^2) = 2$   
220 shows similar features with that of the free-hinge BC, except that the dome-shaped solution at  $f = 0$  does not exist (Figure 4d).  
221 This is because the initiation force  $F_{\text{init}}$  is positive and the membrane cannot be spontaneously curved off from the cell wall.

222 Despite some common features in the  $f$ - $L$  curves for both BCs, differences also exist: (i) under the free-hinge BC, the  
223 initiation force  $F_{\text{init}}$  decreases and remains negative with increasing  $a_0$ , whereas under the fixed-hinge BC,  $F_{\text{init}}$  is negative  
224 for intermediate values of  $a_0$ , and becomes positive for larger  $a_0$  (Figure 4e and f, diamonds); (ii) a similar difference is also  
225 observed for the low-height force barrier  $F_{\max}^1$ , which is monotonically decreasing with  $a_0$  under the free-hinge BC, whereas it  
226 is non-monotonic under the fixed-hinge BC (Figure 4e and f, circles).

227 For a partially coated membrane, the low-height force barrier  $F_{\max}^1$  can be significantly reduced to below  $f_p$  for some coating  
228 areas (Figure 4e and f, circles), whereas the high-height force barrier  $F_{\max}^2$  increases with  $a_0$  and remains above  $f_p$  (Figure 4e  
229 and f, stars). This is because the force barrier  $F_{\max}^2$  must be greater than the elongation force  $F_e$ , which equals  $f_p$  for both BCs  
230 and any coating areas. This trade off between the two force barriers implies there is an optimum coating area that minimizes the  
231 overall force barrier. With the parameters listed in Table 2, the optimum coating area is about 1200 nm<sup>2</sup> for the free-hinge BC  
232 and 2000 nm<sup>2</sup> for the fixed-hinge BC. The minimum force barrier is about 2500 pN for the free-hinge BC, and about 4000pN  
233 for the fixed-hinge BC. Compared with the force barrier of 8000pN for a fully coated membrane under the fixed-hinge BC,  
234 partially coating the membrane significantly reduces the force barrier.

## 235 Increasing the spontaneous curvature of partially coated membrane leads to a sharp transition of 236 the membrane shape.

237 In this section, we vary the spontaneous curvature  $c_0$  while fixing the coating area ( $a_0/(2\pi R_p^2) = 1$ ) to study how  $c_0$  influences  
238 the  $f$ - $L$  curves for a partially coated membrane. Upon gradually increasing  $c_0$ , the  $f$ - $L$  curve shows similar trends to what  
239 we observed when increasing the coating area. Above a critical value of  $c_0$ , a high-height force barrier  $F_{\max}^2$  appears on the  
240  $f$ - $L$  curve in addition to the low-height force barrier  $F_{\max}^1$  (Figure 5a and b). Further increasing the spontaneous curvature  $c_0$   
241 splits the  $f$ - $L$  curve into two branches, a small- $L$  branch and a large- $L$  branch (Figure 5c and d). A striking new feature is that  
242 when  $c_0 R_p = 2$ , the force for the entire small- $L$  branch falls below zero (Figure 5c and d). The zero force  $f = 0$  intersects with

243 the  $f$ - $L$  curve on the long- $L$  branch at only one point, which corresponds to a highly curved  $\Omega$ -shape (Figure 5c and d, inset,  
244 labeled by squares). This shape has the lowest free energy (Figure S3, c and d, labeled by squares), which implies that even in  
245 the absence of forces, increasing the spontaneous curvature  $c_0$  can lead to a transition of the membrane from the dome-shape in  
246 the small- $L$  branch to the  $\Omega$ -shape in the large- $L$  branch. The membrane height has a sharp increase during this transition.

247 The spontaneous curvature  $c_0$  not only influences the forces but also the morphology of the clathrin coat. When  $c_0 R_p = 2$ ,  
248 the clathrin coat tends to bend the membrane to a narrow radius of  $\approx 0.5 R_p$  and the coated area exhibits a pearl-like structure  
249 when elongated (Figure 5c and d, triangles). However, for  $c_0 R_p = 1$ , the clathrin coat maintains a roughly hemispherical cap  
250 (Figure 4a and b, triangles).

251 Both the low-height force barrier  $F_{\max}^1$  and the initiation force  $F_{\text{init}}$  linearly decrease with increasing  $c_0$  (Figure 5e and f,  
252 circles and diamonds), and they become negative when  $c_0$  is beyond a critical value. By contrast, the high-height force barrier  
253  $F_{\max}^2$  linearly increases with  $c_0$  (Figure 5e and f, stars), and remains above  $f_p$ . The optimum spontaneous curvature, which has  
254 the minimum force barrier, is about  $0.8 R_p^{-1}$  for both BCs. The corresponding force barrier is as much as  $f_p$ , which is the lowest  
255 force barrier one can achieve by partially coating the membrane with curvature-generating proteins. With the parameters listed  
256 in Table 2, the optimum spontaneous curvature corresponds to a preferred radius of about 40 nm for the free-hinge BC and  
257 50 nm for the fixed-hinge BC. The force barrier for the free-hinge BC is about 2500pN, and for the fixed-hinge BC is about  
258 4000pN.

### 259 **Our theory agrees well with experiments.**

260 The shapes of endocytic invaginations in budding yeast have been imaged with electron tomography (14). These shapes typically  
261 do not have perfect axisymmetry assumed in our model (Figure 6a and b). However, from these images one can numerically fit  
262 the membrane shape and extract geometric features of the shape, which typically include the tip radius  $R_t$ , the tip-neck distance  
263  $D_t$  and the membrane height  $L$  (14). The tip radius  $R_t$  is defined as the reciprocal of the meridian curvature  $\psi$  averaged over  
264 an arc that extends over 15 nm from the endocytic invagination tip. The tip-neck distance  $D_t$  is defined as the distance from  
265 the center of the neck to the most distant profile point from the neck. The membrane height  $L$  is defined as the maximum  
266 height of the fitted profile above the base. The experimental datasets  $R_t$  v.s.  $L$  and  $D_t$  v.s.  $L$  contain the shape information of  
267 the endocytic invagination across different stages of CME. We use the two datasets as the fitting data to compare our theory  
268 with experiments. The fitting procedure is elaborated in the Appendix, where we use the characteristic radius  $R_p$  as the single  
269 parameter to fit the data. We find the optimum  $R_p^*$  that minimizes the fitting error for the two datasets. For the free-hinge BC, the  
270 optimum  $R_p^* = 16\text{nm}$ , and for the fixed-hinge BC  $R_p^* = 21\text{nm}$  (Figure S4). The fitting errors at the optimum  $R_p^*$  are comparable  
271 for the two BCs, and we cannot distinguish which BC fits the experimental data better (Figure S4).

272 Using the optimum  $R_p^*$ , our calculated membrane shapes agree well with the experimental profile, particularly in the early  
273 stage when the membrane height is low (Figure 6a and b). For membrane shapes that are higher than 65 nm, experimental  
274 membrane shapes are typically asymmetric and exhibit a narrower neck than the calculated ones, probably due to the presence  
275 of other membrane proteins that arrive later during CME and impose a cylindrical curvature at the neck of the invagination (e.g.  
276 amphiphysins). These effects are not considered in our model.

277 As for the geometric features, experimental data shows that the tip radius  $R_t$  drops from 50 – 100nm to 15nm as the  
278 membrane height increases. Our theory matches the trend of the experimental data, particularly for the part where  $R_t < 40$  nm  
279 (Figure 6c and d). The fitting for the tip radius with the free-hinge BC is slightly better than that with the fixed-hinge BC. For  
280 the tip-neck distance  $D_t$ , our theory predicts that  $D_t$  grows slowly with the membrane height  $L$  when  $L$  is less than 65 nm.  
281 Beyond this point,  $D_t$  scales almost linearly with  $L$  with a larger slope than the initial phase. This theoretical prediction again  
282 matches well with the experimental data (Figure 6e and f). The fitting for the tip-neck distance with the fixed-hinge BC is  
283 slightly better than that with the fixed-hinge BC.

284 We stress that the different optimum  $R_p^*$ s for the two BCs result in a large difference in the magnitude of forces in the  $f$ - $L$   
285 curve (Figure 6g and h). This is because the unit of the force is the characteristic force  $f_p$  which scales with the characteristic  
286 radius  $R_p$  as  $f_p \propto R_p^2$ . As a result, the force barrier is about 2500 pN for the free-hinge, while it is about 4000 pN for the  
287 fixed-hinge.

### 288 **Fixed base v.s. freely moving base.**

289 We have focused on BCs where the base radius of the membrane is fixed. For a membrane fully coated with curvature-generating  
290 proteins, the initiation force  $F_{\text{init}}$  either decreases with the intrinsic curvature  $c_0$  under the free-hinge BC, or is independent of  
291  $c_0$  under the fixed-hinge BC (Figure 3e and f, diamonds and solid lines). A previous work (18) studied a similar homogeneous  
292 model but used the free-base and fixed-hinge BC (BC4 in TABLE 1). This BC led to the surprising conclusion that the initiation  
293 force  $F_{\text{init}}$  of a fully coated membrane is proportional to the spontaneous curvature  $c_0$ , which implies that increasing the

Rui Ma and Julien Berro

spontaneous curvature  $c_0$  hinders CME because it raises the force required to lift the membrane off the cell wall. In addition, as a result of the freely moving base, the model predicted that the base radius  $R_b$  approaches zero when the membrane height is low. This result is inconsistent with experimental observations that the base radius of membrane invaginations remains roughly the same during the entire course of CME, from shallow invaginations to long tubes (Figure 6a and b). Therefore the experimental data supports our assumption that the base of the membrane is maintained at a fixed radius by endocytic proteins or by attachment to the cell wall. A recent systematic study of proteins involved in endocytosis by super-resolution microscopy revealed that many proteins are organized in concentric rings around the clathrin coat (27). These proteins may serve as anchors and may fix the base radius of the endocytic membrane.

The different dependence of the initiation force  $F_{\text{init}}$  on  $c_0$  between the fixed-base BC and the free-base BC can be clarified with a simple example. Since  $F_{\text{init}}$  is only related to the early stage of CME when the membrane is almost flat, we approximate the dome-shaped membrane as a spherical cap and calculate its free energy  $E(R; c_0, R_b)$  as a function of the sphere radius  $R$  for different spontaneous curvatures  $c_0$  and base radii  $R_b$  (Figure 7). For the fixed-base BC, the base radius  $R_b$  is a constant. When  $c_0$  is small,  $E(R; c_0, R_b)$  decreases monotonically with  $R$  and has its minimum at  $R = \infty$ , which implies that a flat shape is more favorable than a curved one (Figure 7a). When  $c_0$  becomes large,  $E(R; c_0, R_b)$  has a nontrivial minimum at a finite radius  $R$  (Figure 7b,  $R_b = 2R_p$ ), which implies that the membrane spontaneously bends into a curved shape. However, for the free-base BC assumed in the work of (18), the base radius  $R_b$  becomes a free parameter and the free energy  $E(R, R_b; c_0)$  is a function of both  $R$  and  $R_b$ . No matter how large  $c_0$  is, the energy  $E(R, R_b; c_0)$  always admits a trivial minimum at  $R_b = 0$ , which represents a solution without any deformation (Figure 7a and b,  $R_b = 0R_p$ ). If a force  $f$  is applied, a nontrivial minimum of the total free energy  $F(R, R_b; f, c_0) = E(R, R_b; c_0) - fL(R, R_b)$  may exist for a positive force  $f$  (Figure S5). However, the base radius for this nontrivial minimum is unrealistically narrow ( $\sim 0.02\text{nm}$ , see Supporting Material), therefore a freely moving base is probably not a proper BC to model CME in yeast.

## DISCUSSION

### Free-hinge v.s. fixed-hinge.

Our analysis of the experimental data favors the BC with fixed base radius over that with freely moving base. However, we cannot directly distinguish whether the angle of the membrane at the base is free to rotate (free-hinge) or fixed to zero (fixed-hinge), since both BCs show good agreements with the experimental data (Figure 6a-f). Under the free-hinge BC, the membrane shape has a kink at the base points. We stress that this discontinuity in the membrane angle is physically and biologically plausible. First, for a membrane fully-coated with curvature generating proteins, the membrane's spontaneous curvature can change abruptly at the base points and such discontinuity of the mechanical properties of the membrane will result in a kink. Second, for a partially-coated membrane whose mechanical properties smoothly change across the base points, the kink can be induced by external factors. Though it is hypothetical, early arriving endocytic proteins, such as myosin-I motors and BAR-domain proteins Syp1p, Cdc15p and Bzz1p form a ring-like structure around the clathrin-coated pit (27). The microscopic interactions between the ring, the membrane and the cell wall determine the exact BCs. At the macroscopic level, the phenomenological method of membrane mechanics used in this paper allows the presence of a kink as long as the underlying microscopic interactions permit. The free-hinge BC is only one of the many possible BCs that form a kink. Even for the fixed-hinge BC, the fixed angle is not necessarily zero but determined by the microscopic interactions. When tuning the membrane angle at the base for the fixed-hinge BC, we notice that the force barrier to pull a bare membrane into a tube can be reduced by increasing the base angle (Figure S6).

Our calculations assume a single type of BCs for the entire stage of CME. We have shown that the free-hinge BC and the fixed-hinge BC might lead to dramatically different  $f$ - $L$  curves. These results suggest a new way to regulate CME by tuning the BCs. By changing the BC from the fixed-hinge to the free-hinge, the force barrier is typically reduced. If at early stage the BC is fixed-hinge, switching to free-hinge permits the accumulated force to drive the transformation of the membrane from a dimple shape to a tubular shape, providing the force is larger than the force barrier determined by the free-hinge BC but smaller than the force barrier determined by the fixed-hinge BC.

### Homogeneous model v.s. inhomogeneous model

We have studied not only the homogeneous model, i.e., a fully coated (or fully uncoated) membrane, but also the inhomogeneous model, i.e., a partially-coated membrane. Comparing the two models, we noted the following differences: (i) In the inhomogeneous model, two force barriers in the  $f$ - $L$  curve emerge as the spontaneous curvature  $c_0$  increases, and the low-height force barrier can be significantly reduced, even to values below zero, with increasing  $c_0$  (Figure 5e and f, circles). However, in the homogeneous model, there is only one force barrier, which can be hardly reduced with increasing  $c_0$ , especially in the fixed-hinge BC (Figure 3e and f, circles). (ii) The elongation force  $F_e$  can be reduced with  $c_0$  in the homogeneous model (Figure 3e and f,



squares), while in the inhomogeneous model it remains at a constant value of  $f_p$  regardless of BCs and parameter values of  $a_0$  and  $c_0$ . These differences suggest that a partially-coated membrane can be spontaneously lifted up to a significant height via the curvature-generating protein coat, while it is impossible to do so when the membrane is fully coated.

### Actin polymerization alone is insufficient to overcome the force barrier for CME in yeast cells even with the help of proteins that induce membrane curvature

One of the key questions we aimed to address in this paper is how much force is needed to pull a membrane tube against high turgor pressure during CME. We have assumed a turgor pressure of 1 MPa and estimated that the force barrier is about 2500 pN for the free-hinge BC, but 4000 pN for the fixed-hinge BC (Figure 6g and h). In this calculation, we have assumed a point force acting on the membrane, which is a good approximation if the forces produced by actin filaments are concentrated near the tip of the membrane since the point force is the limit of a concentrated force distribution. We expect the point force is the most efficient way to deform a flat membrane into a tubular shape since it minimizes the total amount of force necessary to deform the membrane. Indeed, let's consider a concentrated force distribution acting on the membrane such that the normal stress is larger than the turgor pressure at the stress-applied area. The stress is able to overcome the turgor pressure, therefore pulls the membrane up locally, and the stress-free parts of the membrane are raised up correspondingly. If the same amount of force is distributed on a larger area, the resulting stress is reduced and might be smaller everywhere on the membrane than the turgor pressure, and therefore could not pull the membrane up. Based on this argument, we expect our results provide a lower bound for the force barrier. However, even 2500pN is still beyond the force ( $< 200$ pN) that can be generated by polymerization alone of 150 – 200 actin filaments at the endocytic site (45, 50), given that the measured polymerization force for a single filament is only 1pN and the force generated by a bundle of filaments is usually smaller than the sum of each individual ones (51). Investigating non-polymerization based force production by the actin machinery will be our future work. A possible way is to release the elastic energy stored in geometrically frustrated crosslinkers, such as fimbrin (52, 53).

### CONCLUSION

We have studied membrane deformations driven by a point force and by curvature-generating proteins in the presence of a high turgor pressure. A significant amount of force is required to deform the membrane as a result of the high turgor pressure. We have investigated possible ways to reduce the force requirement. This includes fully or partially coating the membrane with curvature-generating proteins and letting the membrane angle at the base freely rotate. By comparing with experimental data, we have shown that the BC with a fixed base radius is more appropriate than the freely moving base in describing membrane invaginations at the endocytic sites. The minimum force barrier predicted by our theory is about 2500 pN.

### APPENDIX

#### Derivation of the membrane shape equations.

The membrane shape is parameterized with its meridional coordinates  $[R(s), Z(s)]$ , which are related to the tangent angle  $\psi(s)$  via the geometrical relation:

$$\dot{R} = \cos \psi, \quad (7)$$

and

$$\dot{Z} = -\sin \psi. \quad (8)$$

In order to obtain the Euler-Lagrange equation associated with the free energy Eq. (1), we express  $\mathcal{G}$  in Eq. (2) explicitly as

$$\mathcal{G} = \frac{\kappa}{2} R(\dot{\psi} + \frac{\sin \psi}{R} - c_0)^2 + \sigma R + \frac{pR^2}{2} \sin \psi - \frac{f}{2\pi} \sin \psi + \gamma(\dot{R} - \cos \psi). \quad (9)$$

Here we introduce the rescaled Lagrangian multiplier  $2\pi\gamma(s)$  to impose the geometric constraint set by Eq. (7). The variation of the functional  $G$  in Eq. (2) reads

$$\begin{aligned} \frac{\delta G}{2\pi} &= \int_0^S ds \left\{ \left[ \frac{\partial \mathcal{G}}{\partial \psi} - \frac{d}{ds} \frac{\partial \mathcal{G}}{\partial \dot{\psi}} \right] \delta \psi + \left[ \frac{\partial \mathcal{G}}{\partial R} - \frac{d}{ds} \frac{\partial \mathcal{G}}{\partial \dot{R}} \right] \delta R + \frac{\partial \mathcal{G}}{\partial \gamma} \delta \gamma \right\} \\ &+ \frac{\partial \mathcal{G}}{\partial \dot{\psi}} \delta \psi \Big|_{s=0}^{s=S} + \frac{\partial \mathcal{G}}{\partial \dot{R}} \delta R \Big|_{s=0}^{s=S}, \end{aligned} \quad (10)$$

Rui Ma and Julien Berro

381 which contains both the bulk terms (first line) and the boundary terms (second line). The Euler-Lagrange equations can be  
382 obtained by the vanishing bulk terms, which are reduced to

$$\ddot{\psi} = \frac{\cos \psi \sin \psi}{R^2} - \frac{\dot{\psi}}{R} \cos \psi + \frac{p}{2\kappa} R \cos \psi + \frac{\gamma}{\kappa R} \sin \psi - \frac{f}{2\pi\kappa R} \cos \psi, \quad (11)$$

383 and

$$\dot{\gamma} = \frac{1}{2}\kappa(\dot{\psi} - c_0)^2 - \frac{\kappa \sin^2 \psi}{2R^2} + \sigma + pR \sin \psi, \quad (12)$$

384 as well as Eq. (7).

385 For the homogeneous model, the spontaneous curvature  $c_0$  is uniform and  $\mathcal{G}$  is explicitly independent of the arclength  $s$ .  
386 This symmetry leads to a conserved quantity (54)

$$\mathcal{H} \equiv \frac{\kappa}{2} R \left[ \dot{\psi}^2 - \left( \frac{\sin \psi}{R} - c_0 \right)^2 \right] - \frac{p}{2} R^2 \sin \psi - \sigma R + \gamma \cos \psi + \frac{f}{2\pi} \sin \psi = 0. \quad (13)$$

387 For the inhomogeneous model, the spontaneous curvature  $c_0(s)$  is spatially varied over the arclength as depicted by Eq. (6).  
388 The variation of the functional  $G$  in Eq. (10) needs to change to include a spatially varied surface tension  $\sigma(s)$  to ensure that  
389 the membrane area is locally unstretchable. The detailed derivation can be found in Ref. (16). The new equation for  $\sigma$  reads

$$\dot{\sigma} = \kappa \left( \frac{\sin \psi}{R} + \dot{\psi} - c_0 \right) \dot{c}_0. \quad (14)$$

390 It is easy to show that this equation is equivalent to require that  $\mathcal{H}$  is conserved, i.e.,  $\dot{\mathcal{H}} = 0$ .

### 391 Derivation of the boundary conditions.

392 In order to get proper BCs, we set the boundary terms in Eq. (10) to zero. At the membrane tip ( $s = 0$ ),  $R = 0$  by definition and  
393 we choose  $\psi = 0$  to avoid any singularity. As a result,  $\delta R = 0$  and  $\delta \psi = 0$  and the boundary terms automatically vanish.

394 At the base of the invagination ( $s = S$ ), as a result of the product of two conjugate variables  $\frac{\partial \mathcal{G}}{\partial \psi}$  and  $\delta \psi$ , we have the freedom  
395 to let either  $\frac{\partial \mathcal{G}}{\partial \psi} = 0$ , i.e. the membrane can be freely rotate (free-hinge BC), or  $\delta \psi = 0$ , i.e. the angle of the membrane is fixed  
396 (fixed-hinge BC). Similarly, we can choose  $\frac{\partial \mathcal{G}}{\partial R} = 0$ , i.e. the base can freely move, or  $\delta R = 0$ , i.e. the base radius is fixed. The  
397 combination of the two choices make up the four possible BCs listed in Table 1.

### 398 Numerical methods to calculate the force-height ( $f$ - $L$ ) relationships

399 For the homogeneous model with a uniform spontaneous curvature  $c_0$ , Eqs. (7), (11), (12) constitute a complete system of  
400 equations, which are numerically solved by a shooting method that has been widely used in Helfrich models (18, 49). The idea  
401 is to numerically integrate the three equations from the membrane tip  $s = 0$  with MATLAB solver ode45 until the free-hinge  
402 BC or the fixed-hinge BC is met. The numerical integration needs input of the initial values of  $R(s = 0)$ ,  $\psi(s = 0)$ ,  $\dot{\psi}(s = 0)$   
403 and  $\gamma(s = 0)$ . The radius  $R(s = 0)$  should be zero at the membrane tip. However, Eqs. (11) and (12) have a singular point  
404 at  $R = 0$ . In order to avoid the singular point, we set  $R(s = 0) = \epsilon R_p$ , where  $\epsilon = 0.001$  is chosen to be a small number such  
405 that values smaller than 0.001 do not produce numerically distinguishable results. The initial angle  $\psi(s = 0) = 0$  is to ensure  
406 continuity of the membrane shape at the tip. The derivative  $\dot{\psi}(s = 0)$  is the tuning parameter to match the BCs. For any given  
407  $\dot{\psi}(s = 0)$ ,  $\gamma(s = 0)$  is solved via Eq. (13). Once the four initial values are set, the numerical integration continues until the  
408 free-hinge BC or the fixed-hinge BC is met. This is achieved by setting the termination event function in the ode45 solver. The  
409 membrane height  $L = \int_0^S \sin \psi ds$  is then obtained via Eq. (8). Note that for different trials, the final arclength  $S$  when the solver  
410 terminates are different. The shooting method is to find a proper pair of  $(\dot{\psi}(s = 0), f)$  such that when the integration terminates,  
411 i.e., the free-hinge BC or the fixed-hinge has been satisfied, the other BCs  $R = R_b$  and  $L = L_0$  are fulfilled for a particular  
412 membrane height  $L_0$ . In order to construct the  $f$ - $L$  curve, once we get the solution of  $(\dot{\psi}^*(s = 0), f^*)$  for a particular  $L_0$ , we  
413 extend the membrane height  $L$  with a small increment to  $L_0 + \Delta L$ . The solution  $(\dot{\psi}^*(s = 0), f^*)$  for  $L = L_0$  are then used as the  
414 initial trial for searching the solution for  $L = L_0 + \Delta L$ .

415 For the inhomogeneous model with a spatially varied spontaneous curvature  $c_0(s)$  defined by Eq. (6), Eqs. (7),(11),(12),(14)  
416 and  $\dot{a} = 2\pi R$  constitute a complete system of equations. In addition to the four initial values required by the homogeneous  
417 model,  $a(s = 0)$  and  $\sigma(s = 0)$  are needed to numerically integrate the equations. We set  $a(s = 0) = 0$  and tune the combination  
418 of  $(\dot{\psi}(s = 0), \sigma(s = 0), f)$  to match  $R = R_b$ ,  $L = L_0$  and  $\sigma = \sigma_0$  when the solver terminates. The  $f$ - $L$  curve is constructed in a  
419 similar way by gradually extending the membrane height  $L$  with small increment of  $\Delta L$ .

## 420 Numerical procedure to fit the experimental data

421 We have 7 parameters in the inhomogeneous model listed in Table 2. The turgor pressure  $p$  is fixed at  $p = 1$  MPa. For the  
422 remaining 6 parameters, we express five of them as the function of the characteristic radius  $R_p$  and use  $R_p$  as the single parameter  
423 to fit the experimental data. The surface tension at the base  $\sigma$  is set to be  $0.002pR_p$  such that the surface tension  $\sigma$  plays a much  
424 less important role than the turgor pressure  $p$  in determining the tube radius because  $\sqrt{\kappa/2\sigma} = 22R_p \gg R_p$ . The base radius  $R_b$   
425 is fixed at  $R_b = 2R_p$  such that for a bare membrane, the force barrier  $F_{\max}$  as a function of  $R_b$  is close to the plateau and not  
426 sensitive to the variation of base radius (see Figure 2 e and f). Based on the experimental observation that the copy number  
427 of clathrin molecules stays small and almost constant during the assembly and disassembly of actin meshwork (45), and the  
428 measured copy number 30-40 implies a hemispherical cap of the clathrin coat, we assume the coating area  $a_0 = 2\pi R_p^2$  and  
429 the spontaneous curvature  $c_0 = 1/R_p$ . The sharpness of the coating edge is controlled by the parameter  $\alpha$ , which is set to be  
430  $10/(2\pi R_p^2)$ . Values of  $\alpha$  greater than  $10/(2\pi R_p^2)$  do not make a difference on the resulting  $f$ - $L$  curve (Figure S7).

431 We use the geometric features  $R_t$  and  $D_t$  v.s. membrane height  $L$  as our fitting data. For the data points of  $\{(L^i, R_t^i)\}$ ,  $i =$   
432  $1, \dots, M$  in Figure 6c and d, the corresponding theoretical prediction of the tip radius  $\text{ThR}(L^i)$  is calculated for a given  $R_p$ .  
433 The fitting error then reads

$$\text{err1} = \frac{1}{M} \sum_{i=1}^M |R_t^i - \text{ThR}(L^i)|. \quad (15)$$

434 Similarly the fitting error for the distance from neck to tip  $D_t$  reads

$$\text{err2} = \frac{1}{M} \sum_{i=1}^M |D_t^i - \text{ThD}(L^i)|, \quad (16)$$

435 where  $\text{ThD}(L^i)$  denotes the theoretical prediction of  $D_t$  at  $L = L^i$ . When plotting  $\text{err1} + \text{err2}$  as a function of the fitting  
436 parameter  $R_p$ , we find the optimum  $R_p^*$  that minimizes the sum  $\text{err1} + \text{err2}$  (Figure S4).

## 437 AUTHOR CONTRIBUTIONS

438 RM and JB designed the research. RM carried out all simulations, analyzed the data. RM and JB wrote the article.

## 439 ACKNOWLEDGMENTS

440 This research is supported by National Institutes of Health/National Institute of General Medical Sciences Grant R01GM115636.  
441 We thank Wanda Kukulski, Marko Kaksonen and John Briggs for kindly sharing the micrograph of Figure 1a. We thank Dr.  
442 Pablo Sartori for critical reading of the manuscript.

## 443 REFERENCES

- 444 1. McMahon, H. T., and E. Boucrot, 2011. Molecular mechanism and physiological functions of clathrin-mediated endocytosis.  
445 *Nature Reviews Molecular Cell Biology* 12:517–533. <https://doi.org/10.1038/nrm3151>.
- 446 2. Sorkin, A., and M. A. Puthenveedu, 2013. Clathrin-Mediated Endocytosis, Springer New York, New York, NY, 1–31.  
447 [https://doi.org/10.1007/978-1-4614-6528-7\\_1](https://doi.org/10.1007/978-1-4614-6528-7_1).
- 448 3. Lu, R., D. G. Drubin, and Y. Sun, 2016. Clathrin-mediated endocytosis in budding yeast at a glance. *Journal of Cell*  
449 *Science* 129:1531–1536. <https://jcs.biologists.org/content/129/8/1531>.
- 450 4. Kaksonen, M., and A. Roux, 2018. Mechanisms of clathrin-mediated endocytosis. *Nature Reviews Molecular Cell Biology*  
451 19:313 EP–. <https://doi.org/10.1038/nrm.2017.132>.
- 452 5. Lacy, M. M., R. Ma, N. G. Ravindra, and J. Berro, 2018. Molecular mechanisms of force production in clathrin-mediated  
453 endocytosis. *FEBS Letters* 0. <https://febs.onlinelibrary.wiley.com/doi/abs/10.1002/1873-3468.13192>.
- 454 6. Mettlen, M., P.-H. Chen, S. Srinivasan, G. Danuser, and S. L. Schmid, 2018. Regulation of Clathrin-Mediated Endocytosis.  
455 *Annual Review of Biochemistry* 87:871–896. <https://doi.org/10.1146/annurev-biochem-062917-012644>, pMID:  
456 29661000.
- 457 7. Boulant, S., C. Kural, J.-C. Zeeh, F. Ubelmann, and T. Kirchhausen, 2011. Actin dynamics counteract membrane tension  
458 during clathrin-mediated endocytosis. *Nature Cell Biology* 13:1124–1131. <https://doi.org/10.1038/ncb2307>.

Rui Ma and Julien Berro

- 459 8. Wu, X.-S., S. Elias, H. Liu, J. Heureaux, P. J. Wen, A. P. Liu, M. M. Kozlov, and L.-G. Wu, 2017. Membrane  
460 Tension Inhibits Rapid and Slow Endocytosis in Secretory Cells. *Biophysical Journal* 113:2406 – 2414. <http://www.sciencedirect.com/science/article/pii/S0006349517310810>.  
461
- 462 9. Low, P. S., and S. Chandra, 1994. Endocytosis in plants. *Annual review of plant biology* 45:609–631.
- 463 10. Aghamohammadzadeh, S., and K. R. Ayscough, 2009. Differential requirements for actin during yeast and mammalian  
464 endocytosis. *Nature Cell Biology* 11:1039–1042. <https://doi.org/10.1038/ncb1918>.
- 465 11. Basu, R., E. L. Munteanu, and F. Chang, 2014. Role of turgor pressure in endocytosis in fission yeast. *Molecular biology  
466 of the cell* 25:679–687. <https://www.ncbi.nlm.nih.gov/pubmed/24403609>.
- 467 12. Minc, N., A. Boudaoud, and F. Chang, 2009. Mechanical Forces of Fission Yeast Growth. *Current Biology* 19:1096 –  
468 1101. <http://www.sciencedirect.com/science/article/pii/S0960982209011324>.
- 469 13. Atilgan, E., V. Magidson, A. Khodjakov, and F. Chang, 2015. Morphogenesis of the Fission Yeast Cell through Cell Wall  
470 Expansion. *Current Biology* 25:2150–2157. <https://doi.org/10.1016/j.cub.2015.06.059>.
- 471 14. Kukulski, W., M. Schorb, M. Kaksonen, and J. A. Briggs, 2012. Plasma Membrane Reshaping during Endocytosis Is  
472 Revealed by Time-Resolved Electron Tomography. *Cell* 150:508 – 520. [http://www.sciencedirect.com/science/  
473 article/pii/S0092867412007842](http://www.sciencedirect.com/science/article/pii/S0092867412007842).
- 474 15. Avinoam, O., M. Schorb, C. J. Beese, J. A. G. Briggs, and M. Kaksonen, 2015. Endocytic sites mature by continuous  
475 bending and remodeling of the clathrin coat. *Science* 348:1369–1372. [http://science.sciencemag.org/content/  
476 348/6241/1369](http://science.sciencemag.org/content/348/6241/1369).
- 477 16. Agrawal, A., and D. J. Steigmann, 2008. Modeling protein-mediated morphology in biomembranes. *Biomechanics and  
478 Modeling in Mechanobiology* 8:371. <https://doi.org/10.1007/s10237-008-0143-0>.
- 479 17. Walani, N., J. Torres, and A. Agrawal, 2015. Endocytic proteins drive vesicle growth via instability in high membrane  
480 tension environment. *Proceedings of the National Academy of Sciences* 112:E1423–E1432. [http://www.pnas.org/  
481 content/112/12/E1423](http://www.pnas.org/content/112/12/E1423).
- 482 18. Dmitrieff, S., and F. Nédélec, 2015. Membrane Mechanics of Endocytosis in Cells with Turgor. *PLoS Comput Biol* 11:1–15.  
483 <http://dx.doi.org/10.1371/journal.pcbi.1004538>.
- 484 19. Hassinger, J. E., G. Oster, D. G. Drubin, and P. Rangamani, 2017. Design principles for robust vesiculation in clathrin-  
485 mediated endocytosis. *Proceedings of the National Academy of Sciences* 114:E1118–E1127. [http://www.pnas.org/  
486 content/114/7/E1118](http://www.pnas.org/content/114/7/E1118).
- 487 20. Alimohamadi, H., R. Vasan, J. E. Hassinger, J. C. Stachowiak, and P. Rangamani, 2018. The role of traction in membrane  
488 curvature generation. *Molecular biology of the cell* 29:2024–2035.
- 489 21. Koster, G., A. Cacciuto, I. Derényi, D. Frenkel, and M. Dogterom, 2005. Force Barriers for Membrane Tube Formation.  
490 *Phys. Rev. Lett.* 94:068101. <https://link.aps.org/doi/10.1103/PhysRevLett.94.068101>.
- 491 22. Cuvelier, D., I. Derényi, P. Bassereau, and P. Nassoy, 2005. Coalescence of Membrane Tethers: Experiments, Theory,  
492 and Applications. *Biophysical Journal* 88:2714 – 2726. [http://www.sciencedirect.com/science/article/pii/  
493 S0006349505733257](http://www.sciencedirect.com/science/article/pii/S0006349505733257).
- 494 23. Dimova, R., S. Aranda, N. Bezlyepkina, V. Nikolov, K. A. Riske, and R. Lipowsky, 2006. A practical guide to giant  
495 vesicles. Probing the membrane nanoregime via optical microscopy. *Journal of Physics: Condensed Matter* 18:S1151.  
496 <http://stacks.iop.org/0953-8984/18/i=28/a=S04>.
- 497 24. Zhong-Can, O.-Y., and W. Helfrich, 1987. Instability and deformation of a spherical vesicle by pressure. *Physical review  
498 letters* 59:2486.
- 499 25. Seifert, U., K. Berndl, and R. Lipowsky, 1991. Shape transformations of vesicles: Phase diagram for spontaneous-curvature  
500 and bilayer-coupling models. *Physical review A* 44:1182.
- 501 26. Seifert, U., 1997. Configurations of fluid membranes and vesicles. *Advances in physics* 46:13–137.

- 502 27. Mund, M., J. A. van der Beek, J. Deschamps, S. Dmitrieff, P. Hoess, J. L. Monster, A. Picco, F. Nédélec, M. Kaksonen, and  
503 J. Ries, 2018. Systematic Nanoscale Analysis of Endocytosis Links Efficient Vesicle Formation to Patterned Actin Nucleation.  
504 *Cell* 174:884 – 896.e17. <http://www.sciencedirect.com/science/article/pii/S0092867418308006>.
- 505 28. Carlsson, A. E., 2018. Membrane bending by actin polymerization. *Current Opinion in Cell Biology* 50:1 – 7.  
506 <http://www.sciencedirect.com/science/article/pii/S095506741730128X>, cell Architecture.
- 507 29. Kübler, E., and H. Riezman, 1993. Actin and fimbrin are required for the internalization step of endocytosis in yeast. *The*  
508 *EMBO journal* 12:2855–2862.
- 509 30. Engqvist-Goldstein, Å. E., and D. G. Drubin, 2003. Actin Assembly and Endocytosis: From Yeast to Mammals. *Annual*  
510 *Review of Cell and Developmental Biology* 19:287–332. [https://doi.org/10.1146/annurev.cellbio.19.111401.](https://doi.org/10.1146/annurev.cellbio.19.111401.093127)  
511 [093127](https://doi.org/10.1146/annurev.cellbio.19.111401.093127), pMID: 14570572.
- 512 31. Yarar, D., C. M. Waterman-Storer, and S. L. Schmid, 2005. A Dynamic Actin Cytoskeleton Functions at Multiple  
513 Stages of Clathrin-mediated Endocytosis. *Molecular Biology of the Cell* 16:964–975. [https://doi.org/10.1091/mbc.](https://doi.org/10.1091/mbc.e04-09-0774)  
514 [e04-09-0774](https://doi.org/10.1091/mbc.e04-09-0774), pMID: 15601897.
- 515 32. Sun, Y., A. C. Martin, and D. G. Drubin, 2006. Endocytic Internalization in Budding Yeast Requires Coordinated Actin  
516 Nucleation and Myosin Motor Activity. *Developmental Cell* 11:33 – 46. [http://www.sciencedirect.com/science/](http://www.sciencedirect.com/science/article/pii/S1534580706002462)  
517 [article/pii/S1534580706002462](http://www.sciencedirect.com/science/article/pii/S1534580706002462).
- 518 33. Kaksonen, M., C. P. Toret, and D. G. Drubin, 2006. Harnessing actin dynamics for clathrin-mediated endocytosis. *Nature*  
519 *Reviews Molecular Cell Biology* 7:404–414. <https://doi.org/10.1038/nrm1940>.
- 520 34. Mooren, O. L., B. J. Galletta, and J. A. Cooper, 2012. Roles for actin assembly in endocytosis. *Annual review of*  
521 *biochemistry* 81:661–686.
- 522 35. Goode, B. L., J. A. Eskin, and B. Wendland, 2015. Actin and endocytosis in budding yeast. *Genetics* 199:315–358.
- 523 36. Berro, J., and T. D. Pollard, 2014. Local and global analysis of endocytic patch dynamics in fission yeast using a new  
524 “temporal superresolution” realignment method. *Molecular Biology of the Cell* 25:3501–3514. [https://doi.org/10.](https://doi.org/10.1091/mbc.e13-01-0004)  
525 [1091/mbc.e13-01-0004](https://doi.org/10.1091/mbc.e13-01-0004), pMID: 25143395.
- 526 37. Carlsson, A. E., and P. V. Bayly, 2014. Force Generation by Endocytic Actin Patches in Budding Yeast. *Biophysical*  
527 *Journal* 106:1596 – 1606. <http://www.sciencedirect.com/science/article/pii/S0006349514002823>.
- 528 38. Wang, X., B. J. Galletta, J. A. Cooper, and A. E. Carlsson, 2016. Actin-Regulator Feedback Interactions during  
529 Endocytosis. *Biophysical Journal* 110:1430 – 1443. [http://www.sciencedirect.com/science/article/pii/](http://www.sciencedirect.com/science/article/pii/S0006349516001648)  
530 [S0006349516001648](http://www.sciencedirect.com/science/article/pii/S0006349516001648).
- 531 39. Tweten, D. J., P. V. Bayly, and A. E. Carlsson, 2017. Actin growth profile in clathrin-mediated endocytosis. *Phys. Rev. E*  
532 95:052414. <https://link.aps.org/doi/10.1103/PhysRevE.95.052414>.
- 533 40. Kirchhausen, T., and S. C. Harrison, 1981. Protein organization in clathrin trimers. *Cell* 23:755 – 761. [http://](http://www.sciencedirect.com/science/article/pii/0092867481904396)  
534 [www.sciencedirect.com/science/article/pii/0092867481904396](http://www.sciencedirect.com/science/article/pii/0092867481904396).
- 535 41. Fotin, A., Y. Cheng, P. Sliz, N. Grigorieff, S. C. Harrison, T. Kirchhausen, and T. Walz, 2004. Molecular model for a complete  
536 clathrin lattice from electron cryomicroscopy. *Nature* 432:573 EP –. <https://doi.org/10.1038/nature03079>.
- 537 42. Dannhauser, P. N., and E. J. Ungewickell, 2012. Reconstitution of clathrin-coated bud and vesicle formation with minimal  
538 components. *Nature Cell Biology* 14:634–639. <https://doi.org/10.1038/ncb2478>.
- 539 43. Jin, A. J., K. Prasad, P. D. Smith, E. M. Lafer, and R. Nossal, 2006. Measuring the Elasticity of Clathrin-Coated Vesicles  
540 via Atomic Force Microscopy. *Biophysical Journal* 90:3333 – 3344. [http://www.sciencedirect.com/science/](http://www.sciencedirect.com/science/article/pii/S0006349506725152)  
541 [article/pii/S0006349506725152](http://www.sciencedirect.com/science/article/pii/S0006349506725152).
- 542 44. Lherbette, M., L. RedlingshÄffer, F. M. Brodsky, I. A. T. Schaap, and P. N. Dannhauser, 2019. The AP2 adaptor enhances  
543 clathrin coat stiffness. *The FEBS Journal* 286:4074–4085. [https://febs.onlinelibrary.wiley.com/doi/abs/10.](https://febs.onlinelibrary.wiley.com/doi/abs/10.1111/febs.14961)  
544 [1111/febs.14961](https://febs.onlinelibrary.wiley.com/doi/abs/10.1111/febs.14961).



Rui Ma and Julien Berro

- 545 45. Sirotkin, V., J. Berro, K. Macmillan, L. Zhao, T. D. Pollard, and S. L. Schmid, 2010. Quantitative Analysis of the Mechanism  
546 of Endocytic Actin Patch Assembly and Disassembly in Fission Yeast. *Molecular Biology of the Cell* 21:2894–2904.  
547 <https://doi.org/10.1091/mbc.e10-02-0157>, PMID: 20587778.
- 548 46. Gallop, J. L., C. C. Jao, H. M. Kent, P. J. G. Butler, P. R. Evans, R. Langen, and H. T. McMahon, 2006. Mechanism of  
549 endophilin N-BAR domain-mediated membrane curvature. *The EMBO Journal* 25:2898–2910. [https://www.embopress.  
550 org/doi/abs/10.1038/sj.emboj.7601174](https://www.embopress.org/doi/abs/10.1038/sj.emboj.7601174).
- 551 47. Henne, W. M., H. M. Kent, M. G. J. Ford, B. G. Hegde, O. Daumke, P. J. G. Butler, R. Mittal, R. Langen, P. R. Evans, and  
552 H. T. McMahon, 2007. Structure and Analysis of FCHO2 F-BAR Domain: A Dimerizing and Membrane Recruitment  
553 Module that Effects Membrane Curvature. *Structure* 15:839–852. <https://doi.org/10.1016/j.str.2007.05.002>.
- 554 48. Helfrich, W., 1973. Elastic properties of lipid bilayers: theory and possible experiments. *Zeitschrift für Naturforschung C*  
555 28:693–703.
- 556 49. Derényi, I., F. Jülicher, and J. Prost, 2002. Formation and Interaction of Membrane Tubes. *Phys. Rev. Lett.* 88:238101.  
557 <http://link.aps.org/doi/10.1103/PhysRevLett.88.238101>.
- 558 50. Berro, J., V. Sirotkin, and T. D. Pollard, 2010. Mathematical Modeling of Endocytic Actin Patch Kinetics in Fission  
559 Yeast: Disassembly Requires Release of Actin Filament Fragments. *Molecular Biology of the Cell* 21:2905–2915.  
560 <https://doi.org/10.1091/mbc.e10-06-0494>, PMID: 20587776.
- 561 51. Footer, M. J., J. W. J. Kerssemakers, J. A. Theriot, and M. Dogterom, 2007. Direct measurement of force generation by  
562 actin filament polymerization using an optical trap. *Proceedings of the National Academy of Sciences* 104:2181–2186.  
563 <https://www.pnas.org/content/104/7/2181>.
- 564 52. Ma, R., and J. Berro, 2018. Structural organization and energy storage in crosslinked actin assemblies. *PLOS Computational*  
565 *Biology* 14:1–25. <https://doi.org/10.1371/journal.pcbi.1006150>.
- 566 53. Ma, R., and J. Berro, 2019. Crosslinking actin networks produces compressive force. *Cytoskeleton* 76:346–354.  
567 <https://onlinelibrary.wiley.com/doi/abs/10.1002/cm.21552>.
- 568 54. Jülicher, F., and U. Seifert, 1994. Shape equations for axisymmetric vesicles: A clarification. *Phys. Rev. E* 49:4728–4731.  
569 <https://link.aps.org/doi/10.1103/PhysRevE.49.4728>.

## 570 SUPPLEMENTARY MATERIAL

571 An online supplement to this article can be found by visiting BJ Online at <http://www.biophysj.org>.

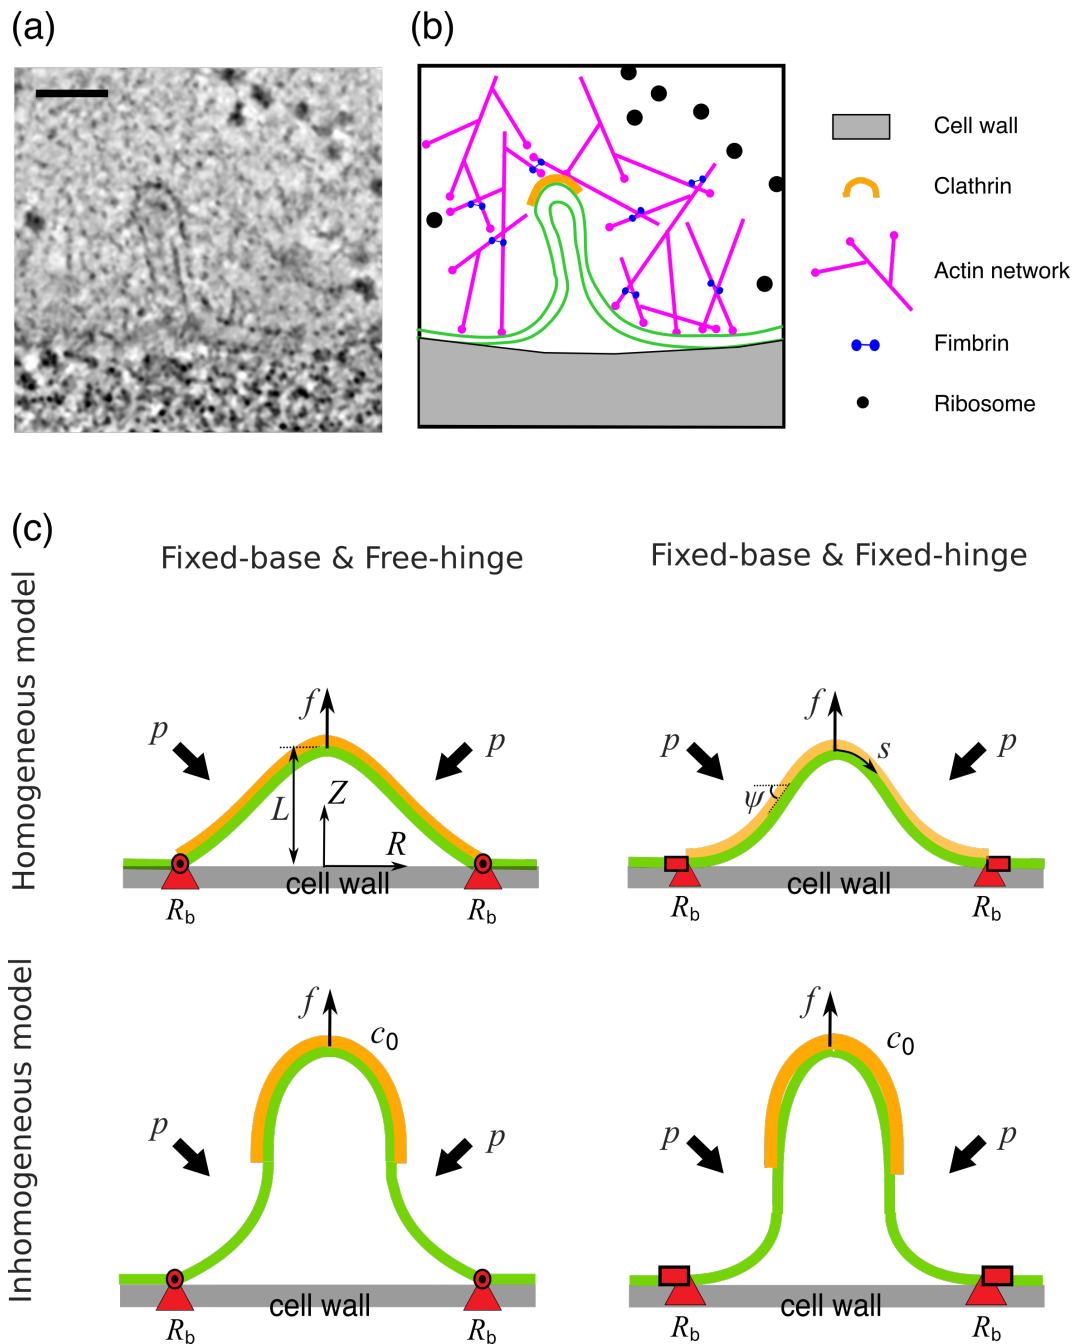

**Figure 1: CME in yeast and membrane models for CME.** (a) Electron micrograph of a membrane tube formed during CME in budding yeast. The image was obtained from <https://www.embl.de/download/briggs/endocytosis.html> and adapted under the permission of the authors in (14). The scale bar is 50nm. (b) Schematic illustration of the membrane and key endocytic proteins shown in (a). The actin network surrounding the membrane tube is depicted as meshwork of branched and crosslinked filaments, though their precise organisation cannot be resolved in the electron micrograph and the meshwork appears as a zone from which ribosomes are excluded. A clathrin coat covering the tip of the membrane tube is also depicted, though the specific spatial distribution of clathrin molecules cannot be resolved in (a). (c) Illustration of the membrane models. The membrane (green layer) is pulled up by a point force  $f$  against osmotic pressure  $p$ . The membrane is coated with proteins (orange layer) that locally change the spontaneous curvature of the membrane  $c_0$ . The position of the base (red triangles) is maintained at a constant value  $R_b$ . We consider a homogeneous model (top) where the membrane is fully coated or fully uncoated with curvature-generating proteins, and an inhomogeneous model (bottom) where the membrane is partially coated. We consider two types of BCs, the free-hinge BC (left) where the membrane is allowed to freely rotate at the base, and the fixed-hinge BC (right) where the membrane angle is fixed.

Rui Ma and Julien Berro

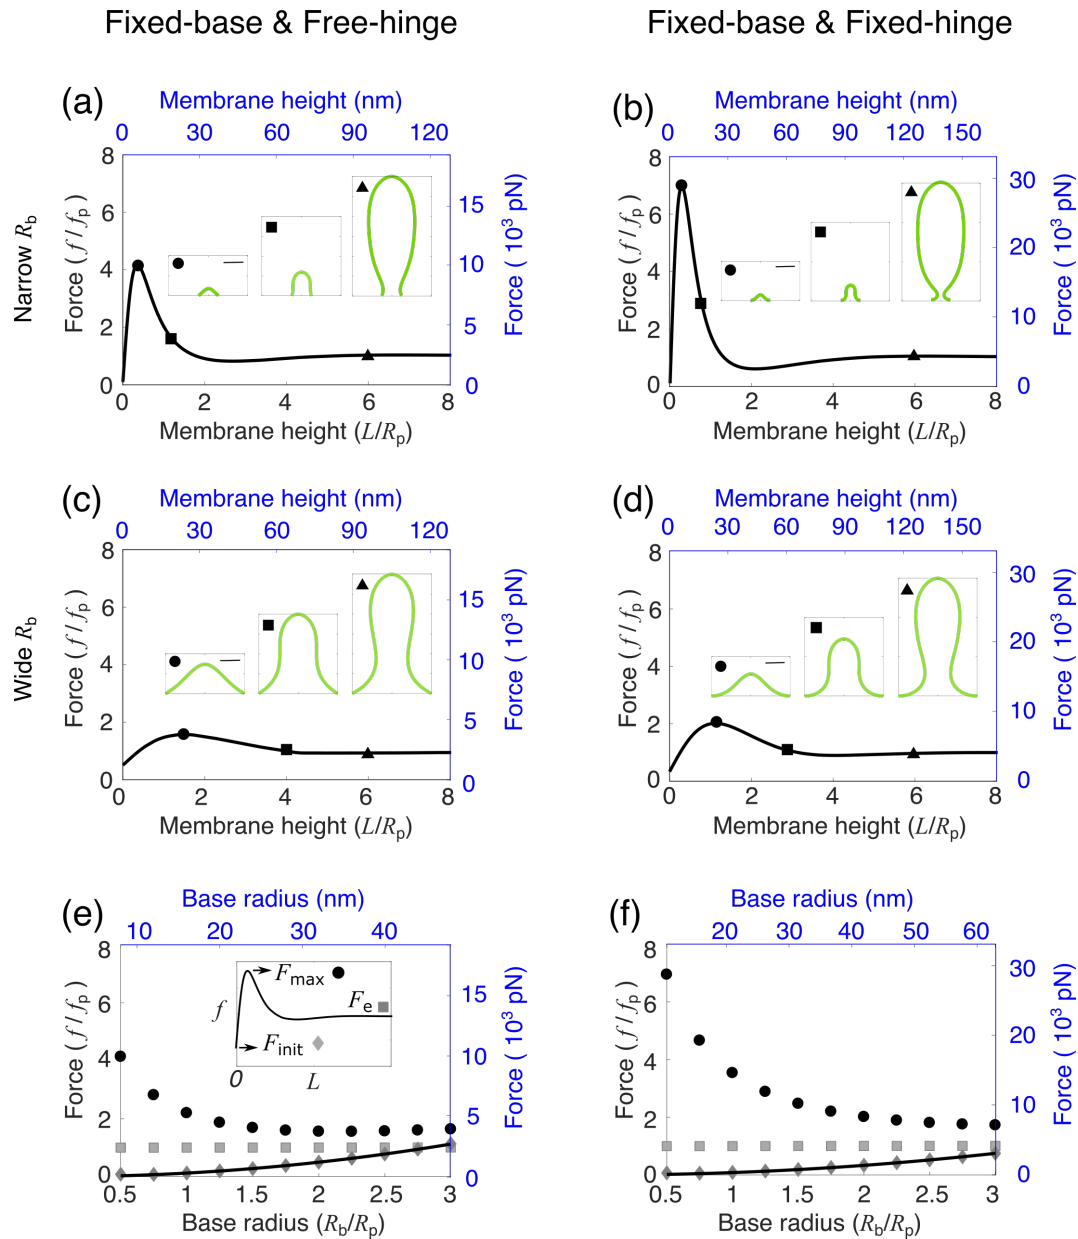

**Figure 2: Effect of the base radius  $R_b$  on the membrane shape and force requirement.** (a - d) Force-height relationship  $f$ - $L$  of membrane deformations for a fixed base radius  $R_b/R_p = 0.5$  in (a, b) and  $R_b/R_p = 2$  in (c, d), where  $R_p$  is the characteristic tube radius (Eq. 4). The spontaneous curvature  $c_0 R_p = 0$ . Insets show membrane shapes at the points indicated by the corresponding symbols on the  $f$ - $L$  curve. The square indicates the critical shape where the membrane is about to form a neck. The scale bar corresponds to the characteristic tube radius  $R_p$ . (e, f) Force barrier  $F_{\max}$  (circle), initiation force  $F_{\text{init}}$  (diamond) and elongation force  $F_e$  (square) for varying base radii  $R_b$ . The solid curve represents the analytical solution for  $F_{\text{init}}$ . (a-f) In the left column (a, c, e), the free-hinge BC is imposed at the base points  $R = R_b$ , while in the right column (b, d, f), the fixed-hinge BC is imposed. On the left and bottom axes (black), non-dimensionalized quantities are used, while on the right and top axes (blue), quantities are measured in their physical units. The parameters are listed in Table 2 except  $R_b = 8\text{nm}$  in (a) and  $R_b = 10.5\text{nm}$  in (b).

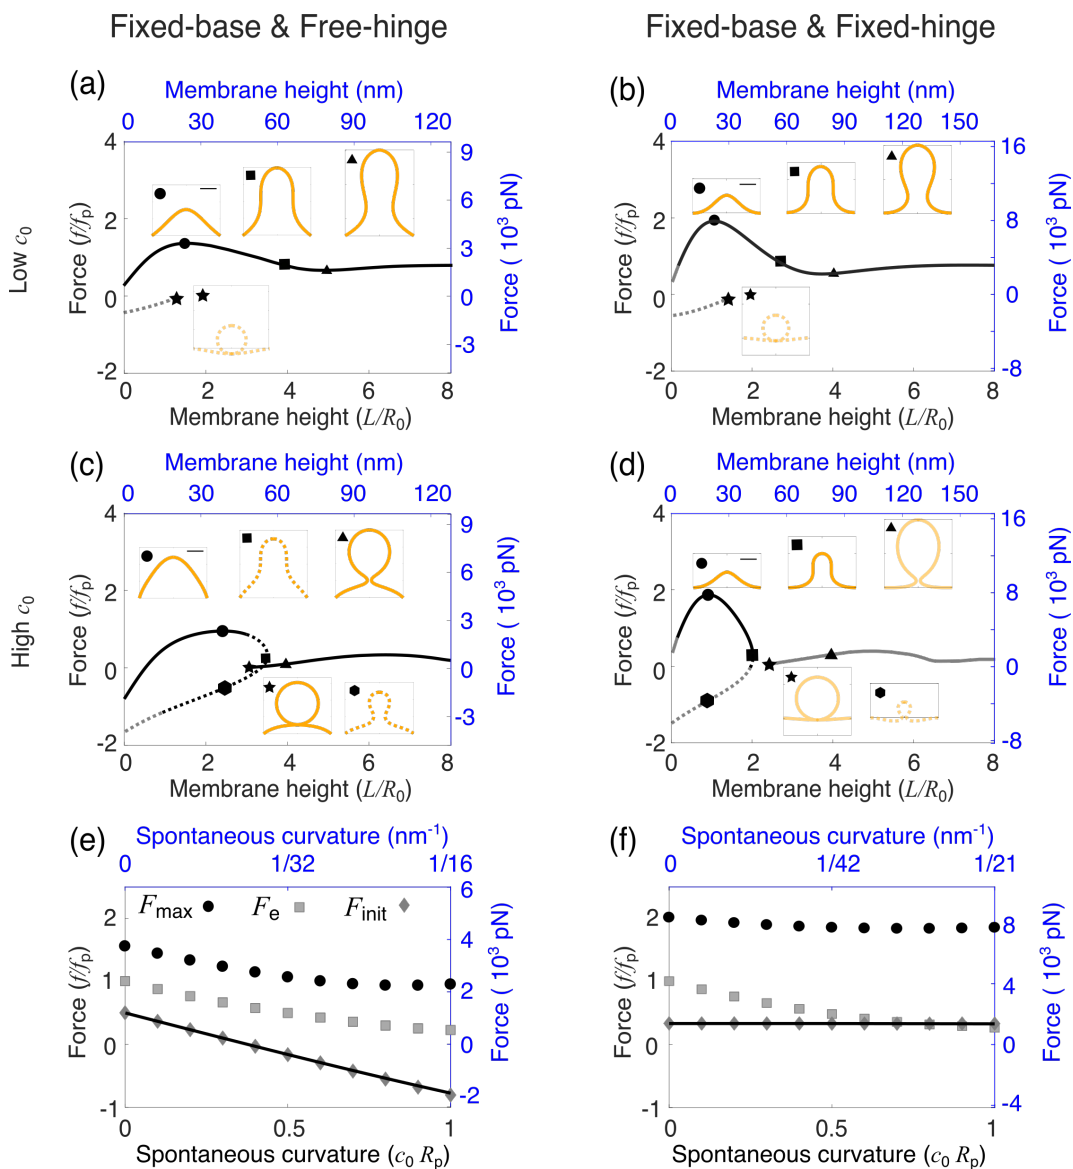

**Figure 3: Effect of the spontaneous curvature  $c_0$  on membrane shape and force requirement for a fully coated membrane.**

(a - d) Force-height ( $f$ - $L$ ) relationship of membrane deformations for a fixed spontaneous curvature  $c_0 R_p = 0.2$  in (a, b) and  $c_0 R_p = 1$  in (c, d). Insets show membrane shapes at the points indicated by the corresponding symbols on the  $f$ - $L$  curve. The square indicates the critical shape where the membrane is about to form a neck. The scale bar corresponds to  $R_p$ . In (a - d), the solid line indicates shapes of the lowest free energy and the dashed line indicates shapes of relatively high free energy. The dark color indicates membrane shapes that are all above  $z = 0$ , and the gray color indicates shapes that have parts below  $z = 0$ . (e, f) Force barrier  $F_{\max}$  (circle), initiation force  $F_{\text{init}}$  (diamond) and elongation force  $F_e$  (square) for varying  $c_0$ . The solid curve represents the analytical solution for  $F_{\text{init}}$ . (a - f) In the left column (a, c, e), the free-hinge BC is imposed at the base points  $R_b = 2R_p$ , while in the right column (b, d, f), the fixed-hinge BC is imposed. On the left and bottom axes (black), non-dimensionalized quantities are used, while on the right and top axes (blue), quantities are measured in their physical units. The parameters are listed in Table 2.

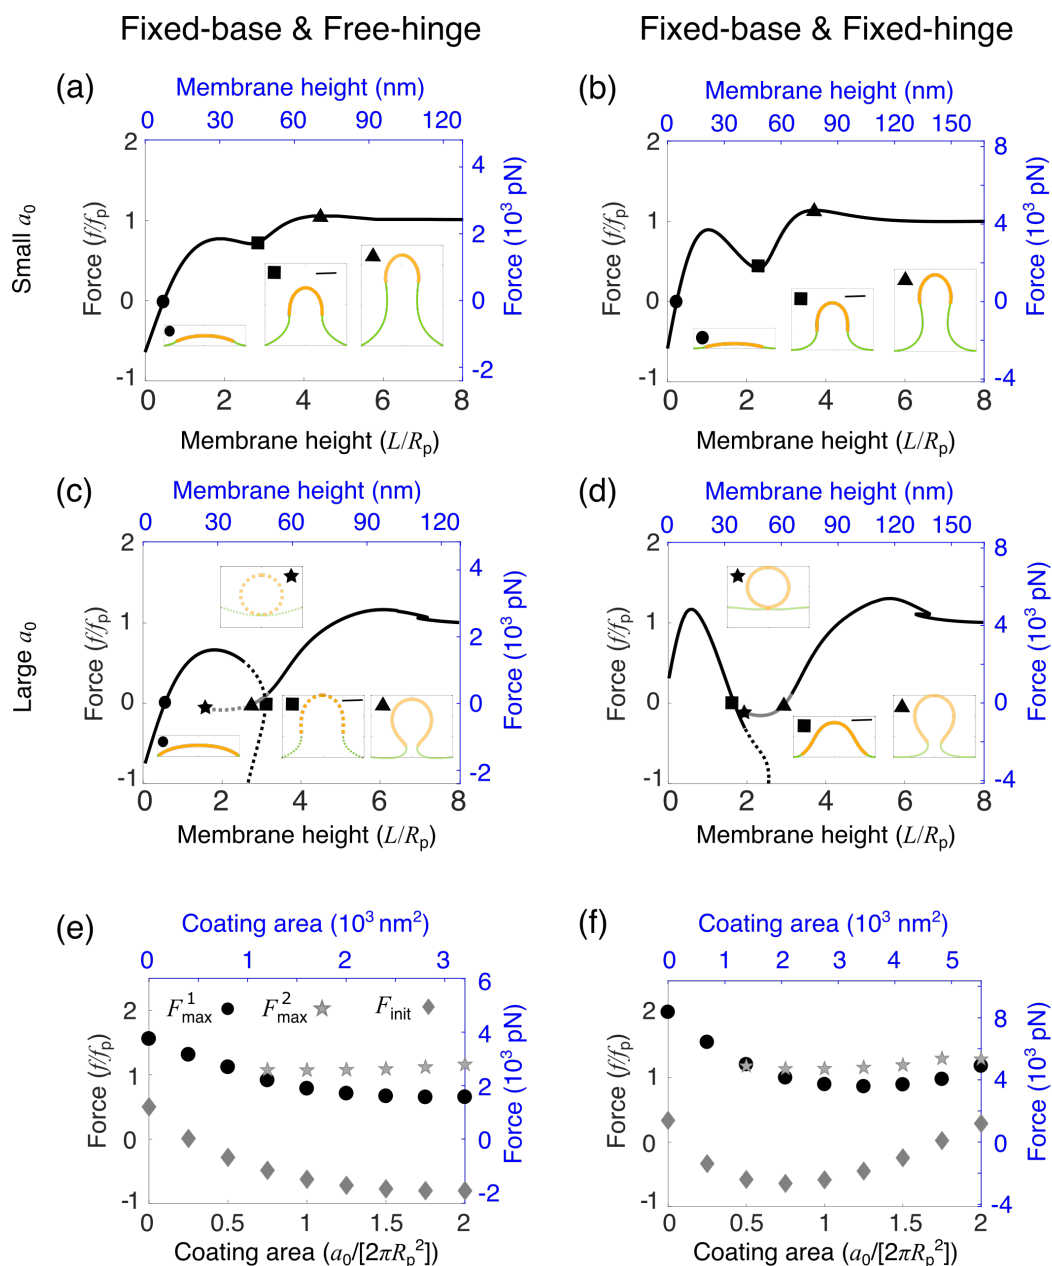

**Figure 4: Effect of the coating area  $a_0$  of curvature-generating proteins on membrane shape and force requirement for a partially coated membrane.** (a - d) Force-height ( $f$ - $L$ ) relationship of membrane deformations for a fixed coating area  $a_0/(2\pi R_p^2) = 1$  in (a, b) and  $a_0/(2\pi R_p^2) = 2$  in (c, d). Insets show membrane shapes at the points indicated by the corresponding symbols on the  $f$ - $L$  curve. The orange part represents the area of the membrane coated with proteins and the green part represents the bare membrane. The scale bar corresponds to  $R_p$ . In (a - d), the solid line indicates shapes of the lowest free energy and the dashed line indicates shapes of relatively high free energy. The dark color indicates membrane shapes that are all above  $z = 0$ , and the gray color indicates shapes that have parts below  $z = 0$ . (e, f) Low-height force barrier  $F_{\max}^1$  (circle), high-height force barrier  $F_{\max}^2$  (star) and initiation force  $F_{\text{init}}$  (diamond) for varying  $a_0$ . (a - f) In the left column (a, c, e), the free-hinge BC is imposed at the base points  $R_b = 2R_p$ , while in the right column (b, d, f), the fixed-hinge BC is imposed. On the left and bottom axes (black), non-dimensionalized quantities are used, while on the right and top axes (blue), quantities are measured in their physical units. The parameters are listed in Table 2.



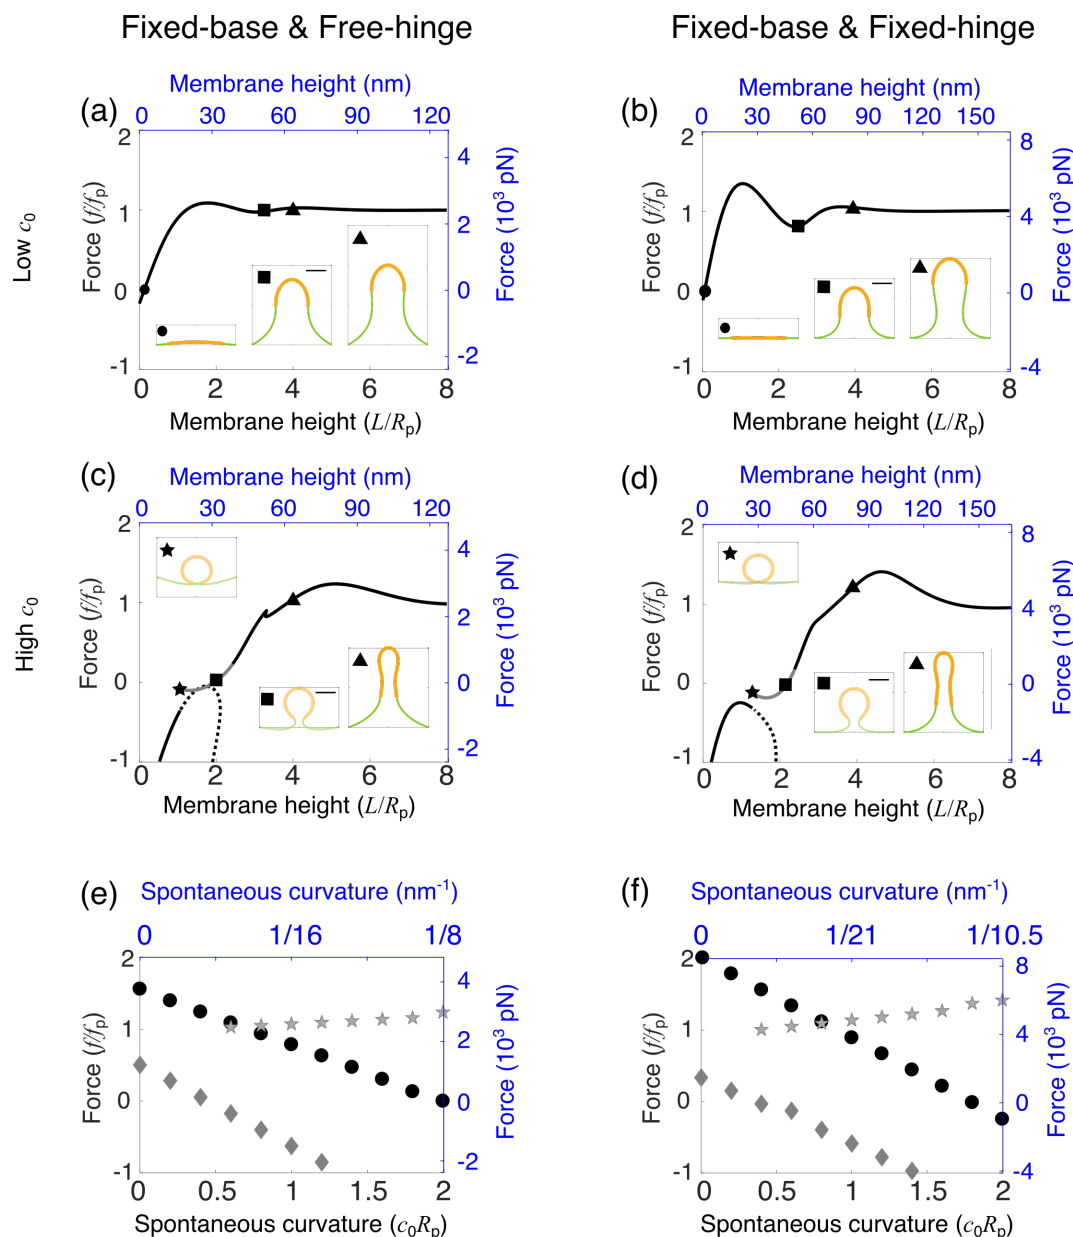

**Figure 5: Effect of the spontaneous curvature  $c_0$  of curvature-generating proteins on membrane shape and force requirement for a partially coated membrane.** (a - d) Force-height ( $f$ - $L$ ) relationship of membrane deformations for a fixed spontaneous curvature  $c_0 R_p = 0.6$  in (a, b) and  $c_0 R_p = 2$  in (c, d). Insets show membrane shapes at the points indicated by the corresponding symbols on the  $f$ - $L$  curve. The orange part represents the area of the membrane coated with proteins and the green part represents the bare membrane. The scale bar corresponds to  $R_p$ . In (a - d), the solid line indicates shapes of the lowest free energy and the dashed line indicates shapes of relatively high free energy. The dark color indicates membrane shapes that are all above  $z = 0$ , and the gray color indicates shapes that have parts below  $z = 0$ . (e, f) Low-height force barrier  $F_{\max}^1$  (circle), high-height force barrier  $F_{\max}^2$  (star) and initiation force  $F_{\text{init}}$  (diamond) for varying  $c_0$ . (a - f) In the left column (a, c, e), the free-hinge BC is imposed at the base points  $R_b = 2R_p$ , while in the right column (b, d, f), the fixed-hinge BC is imposed. On the left and bottom axes (black), non-dimensionalized quantities are used, while on the right and top axes (blue), quantities are measured in their physical units. The parameters are listed in Table 2.

Rui Ma and Julien Berro

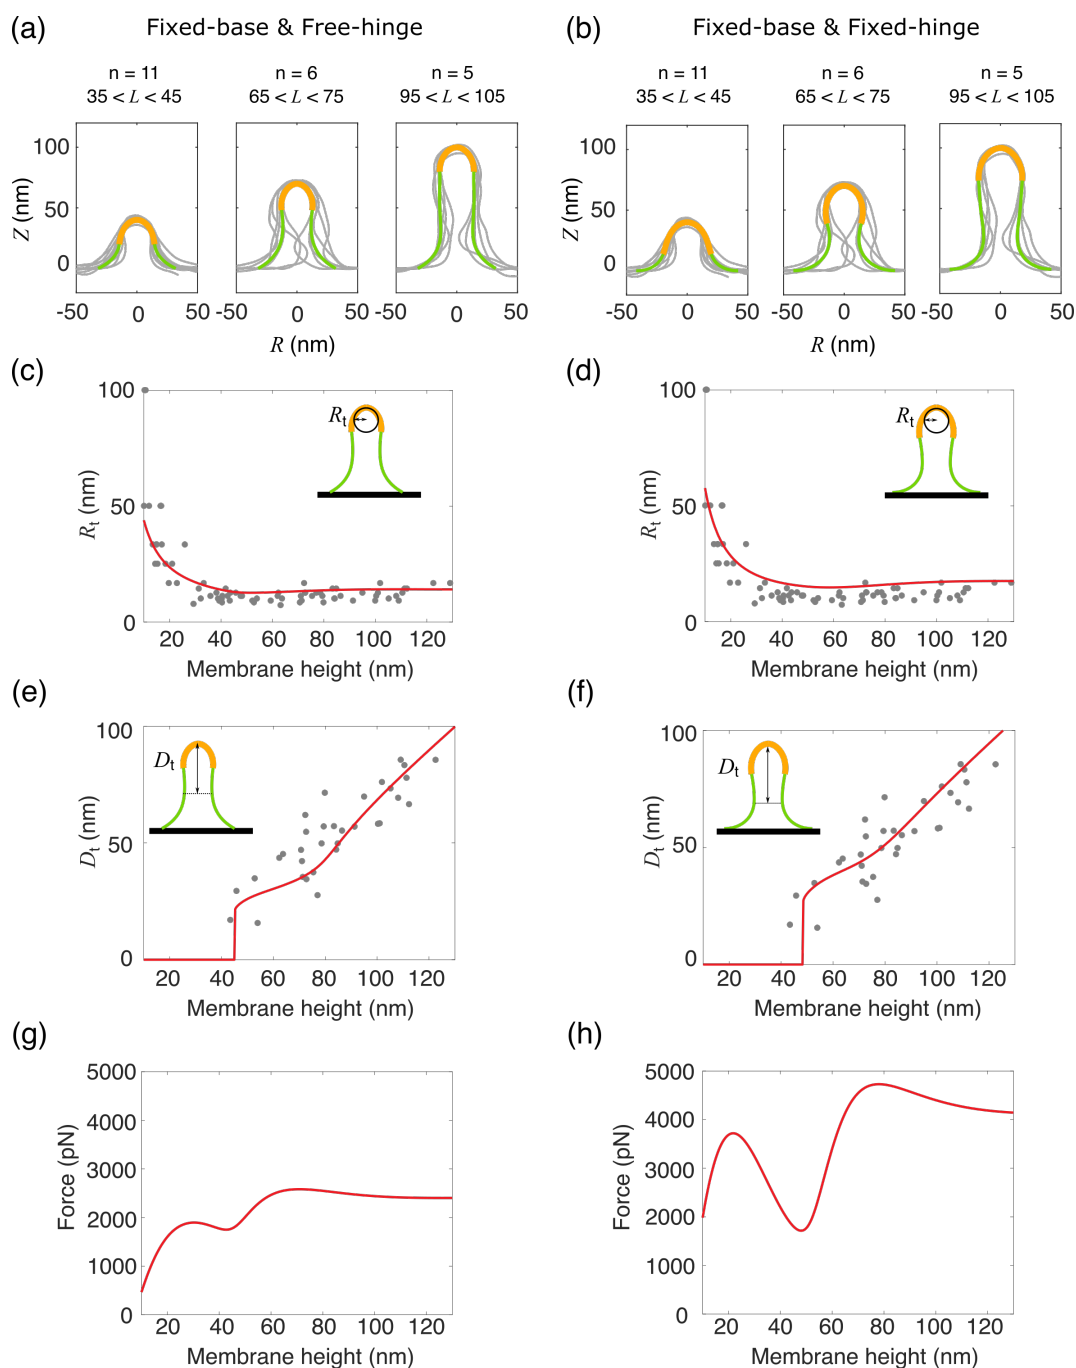

**Figure 6: Comparison between our theory and experiments.** (a, b) Membrane shapes obtained by electron tomography are grouped according to their heights and overlaid at the tip. The data come from (14). The membrane shapes obtained by our model are represented by solid curves. The orange part represents the area of the membrane coated with proteins and the green part represents the bare membrane. (c, d) Comparison of the tip radius  $R_t$  between obtained with our theory (line) and measured experimentally (dots). (e, f) Comparison of the neck to tip distance  $D_t$  between obtained with our theory (line) and measured experimentally (dots). (g, h) Prediction of the force-height ( $f-L$ ) relationship from our theory using the parameters listed in Table 2 which fit the experimental shapes in (a, b). (a-h) In the left column (a, c, e, g), the free-hinge BC is imposed at the base points  $R_b = 32$  nm, while in the right column (b, d, f, h), the fixed-hinge BC is imposed at the base points  $R_b = 42$  nm.

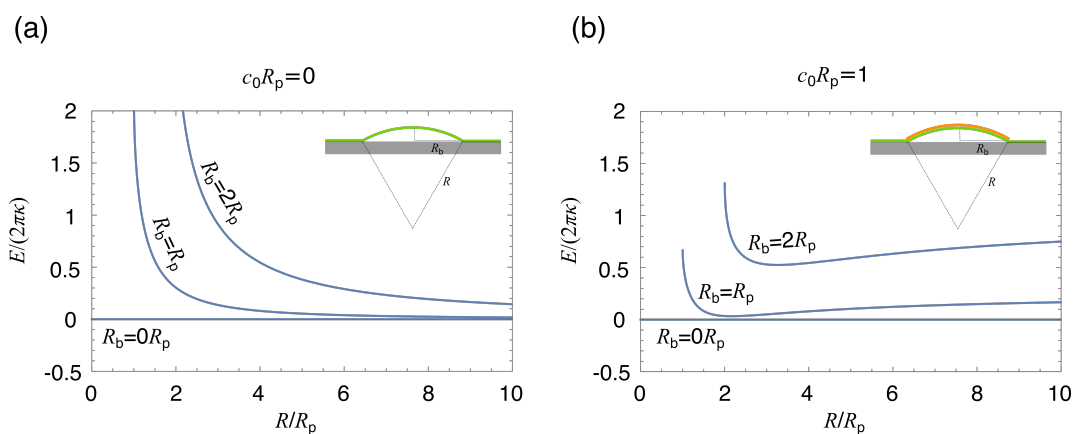

Figure 7: **Free energy of membrane deformations under spherical cap approximation** (a, b) Free energy of the membrane as a function of the sphere radius  $R$  for  $c_0 R_p = 0$  in (a) and  $c_0 R_p = 1$  in (b). For different base radii  $R_b$ , the range of  $R$  is  $[R_b, \infty]$ , where  $R = R_b$  corresponds to a hemi-spherical cap and  $R = \infty$  corresponds to a flat shape.
